1 Short title : Cyanide genetic architecture in cassava

2

3 Title : **Genetic architecture and gene mapping of cyanide in cassava (*Manihot esculenta* Crantz.)**

4

5 **Authors** : Alex C Ogonna<sup>1,2</sup>, Luciano Rogerio Braatz de Andrade<sup>3</sup>, Ismail Y. Rabbi<sup>4</sup>, Lukas A.  
6 Mueller<sup>1,2</sup>, Eder Jorge de Oliveira<sup>3</sup> and Guillaume J. Bauchet<sup>2</sup>

7

8 <sup>1</sup> Cornell University, Ithaca, NY, USA. <sup>2</sup> Boyce Thompson Institute for Plant Research, Ithaca, NY,  
9 USA. <sup>3</sup> Embrapa Mandioca e Fruticultura, Cruz das Almas, BA - Brazil. <sup>4</sup> International institute of  
10 Tropical Agriculture, Ibadan, Oyo state, Nigeria

11

12 One-sentence summary

13 **Identification of an intracellular transporter gene and its allelic variation allow to point out**  
14 **cultivars with up to 30 percent decrease in cassava root cyanide content, toxic for human**  
15 **consumption.**

16

17

18 Footnotes

19 ‡ The author responsible for distribution of materials integral to the findings presented in this article in  
20 accordance with the policy described in the Instructions for Authors ([www.plantphysiol.org](http://www.plantphysiol.org)) is: Eder  
21 Jorge de Oliveira ([eder.oliveira@embrapa.br](mailto:eder.oliveira@embrapa.br)).

22

23

24 Abstract

25 Cassava is a root crop originating from South America and a major staple crop in the Tropics, including  
26 marginal environments. In this study, we focused on South American and African cassava germplasm  
27 and investigated the genetic architecture of Hydrogen Cyanide (HCN), a major component of tuber  
28 quality. HCN is a plant defense component against herbivory but also toxic for human consumption.  
29 We genotyped 3,354 landraces and modern breeding lines originating from 26 Brazilian states and 1,389  
30 individuals were phenotypically characterized across multi-year trials for HCN. All plant material was  
31 subjected to high density genotyping using Genotyping-by-sequencing (GBS). We performed genome  
32 wide association mapping (GWAS) to characterize the genetic architecture and gene mapping of HCN.  
33 Field experiment revealed strong broad and narrow-sense trait heritability (0.82 and 0.41 respectively).  
34 Two major loci were identified, encoding for an ATPase and a MATE protein and contributing up to  
35 7% and 30% of the cyanide concentration in roots, respectively. We developed diagnostic markers for

36 breeding applications, validated trait architecture consistency in African germplasm and investigated  
37 further evidence for domestication of sweet and bitter cassava. Fine genomic loci characterization  
38 indicate; (i) a major role played by vacuolar transporter in regulating HCN content, (ii) co-domestication  
39 of sweet and bitter cassava major alleles to be geographical zone dependant, and (ii) major loci allele  
40 for high cyanide cassava in *Manihot esculenta* Crantz seems to originate from its ancestor, *M. esculenta*  
41 ssp. *flabellifolia*. Taken together these findings expand insights on cyanide in cassava and its  
42 glycosylated derivatives in plants.

43

44

45 Introduction

46 Cassava (*Manihot esculenta* Crantz.) is a starchy root crop widely grown throughout the tropics  
47 (Southeast Asia, Latin America, the Caribbean and sub-Saharan Africa) for human and livestock  
48 consumption, and as feedstock for biofuels and other bio-based materials (Howeler, Lutaladio, and  
49 Thomas 2013). Mostly cultivated by low-income, smallholder farmers, cassava is a staple food crop for  
50 over 800 million people worldwide. Cassava is an efficient crop in marginal areas where poor soils and  
51 unpredictable rainfall dominates (FAO 2018). Cassava has developed defense mechanisms against  
52 herbivores and pathogens, including the biosynthesis of cyanogenic glucosides (CG) (Tako et al.  
53 2011). However, some of the major challenges in cassava includes low tuber protein and carotenoid  
54 content as well as high content of linamarin and lotaustralin CG (K. Jørgensen et al. 2005; Blomstedt  
55 et al. 2012; Gleadow and Møller 2014). CG, characterized as  $\alpha$ -hydroxynitriles, are secondary  
56 metabolites of plant products derived from amino acids (Gleadow and Møller 2014). Cyanogenesis is  
57 the release of toxic hydrogen cyanide in cassava upon tissue disruption. Its concentration is usually  
58 higher in young plants, when nitrogen is in ready supply, or when growth is constrained by nonoptimal  
59 growth conditions (Gleadow and Møller 2014).

60 Cultivars with cyanide content of  $< 100 \text{ mg kg}^{-1}$  fresh weight (FW) are called ‘sweet cassava’  
61 while cultivars with  $100\text{-}500 \text{ mg kg}^{-1}$  are ‘bitter cassava’ (Wheatley et al., 1993). In Brazil, cassava’s  
62 center of diversity, the difference in preference of bitter and sweet cassava appears to be in its role in  
63 subsistence in regions they dominate. Areas where sweet cassava dominates, it is a component of a diet;  
64 whereas areas where bitter cassava dominates, it is the main carbohydrate source, generally  
65 complemented by a protein, such as a fish (Mühlen et al. 2019).

66 Cyanide in cassava is synthesized in the leaf and transported to the roots via the phloem  
67 (Jørgensen, Nour-Eldin, and Halkier 2015). The most abundant CG is linamarin ( $>85\%$ ), and total CG  
68 concentration varies according to the cultivar, environmental conditions, cultural practices and plant  
69 age (McMahon, White, and Sayre 1995). Degradation of linamarin is catalyzed by the enzyme  
70 linamarase, which is found in cassava tissues, including intact roots. The compartmentalization of  
71 linamarase in cell walls and linamarin in cell vacuoles prevents the accidental formation of free cyanide.

72 Disruption of tissues ensures that the enzyme comes into contact with its substrate, resulting in rapid  
73 production of free cyanide via an unstable cyanohydrin intermediary (Wheatley, Chuzel, and Zakhia  
74 2003). Therefore, careful processing is required to remove Hydrogen Cyanide (HCN), especially in  
75 communities with poor nutritional status (Jørgensen et al. 2005; Blomstedt et al. 2012; Gleadow and  
76 Møller 2014). Incomplete processing could result in acute to chronic exposure to HCN (Leavesley et  
77 al. 2008). High dietary cyanogen consumption from insufficiently processed roots of bitter cassava  
78 combined with a protein-deficient diet leads to a neglected disease known as konzo (Kashala-Abotnes  
79 et al. 2019). Konzo is a distinct neurological disease characterized by an abrupt onset of an irreversible,  
80 non-progressive limbs paralysis (Tshala-Katumbay et al. 2001; Nzwalo and Cliff 2011; Kashala-  
81 Abotnes et al. 2019). Juice extraction, heating, fermentation, drying or a combination of these  
82 processing treatments aid in reducing the HCN concentration to safe levels (Wheatley, Chuzel, and  
83 Zakhia 2003). Gleadow and Moller (2014), reported efforts in cassava breeding programmes to actively  
84 select for varieties with lower levels of HCN. However some farmers favour cassava varieties with  
85 higher cyanide content as a source of resistance against herbivores and theft by humans (Lebot 2009).  
86 Modern breeding has not yet succeeded in developing cassava cultivars totally free of CG (Nweke,  
87 Lynam, and Spencer 2002; K. Jørgensen et al. 2005). Previous studies (Kizito et al. 2007; Whankaew  
88 et al. 2011) on cyanide using Quantitative Trait Locus (QTL) approach, could not provide a conclusive  
89 information on the genetic basis for cyanide variation in cassava, owing to the available genomic  
90 resources and narrow dataset background used so far.

91 In this study, we seek to (1) comprehensively understand the genetic architecture of HCN in  
92 cassava, (2) map gene(s) associated to CG variation, (3) develop a fast, cost effective molecular  
93 diagnostic toolkit for breeding purposes to increase selection efficiency, and (4) investigate evidences  
94 of HCN domestication.

95

## 96 Results

### 97 **Large scaled analysis of Brazilian population for HCN content**

98 Phenotypic distribution and variation for cyanide content was measured in a Brazilian  
99 population of 1,246 individuals using picrate titration method, on which a scale of 1 to 9 indicates the  
100 concentration of HCN content (1 and 9 representing extremes of low and high HCN, respectively) (M.  
101 G. Bradbury, Egan, and Howard Bradbury 1999). Based on a determined scale, the cyanide  
102 concentration varies from 2 to 9 with an average of 5.6 with individuals coming from across Brazilian  
103 states (**Figure 1A-B**). About two-thirds of the total plots of 28,203 had missing values, with 9,139 plots  
104 having HCN observations (**Supplementary Table 1; Supplementary Table 2**). Broad-sense  
105 heritability ( $H^2$ ) was calculated to 0.82 for cyanide content, similar to previous observations reported  
106 on several species (Barnett and Caviness 1968; Goodger, Ades, and Woodrow 2004; Gleadow and

107 Møller 2014). Using genotyping data previously recorded for this population (Ogbonna et al., in press),  
108 we observed a genotype variance ( $V_G$ ) higher than genotype-by-year variance ( $V_{G \times Y}$ ), with their ratio  
109 ( $V_{G \times Y}/V_G$ ) showing an interaction of 0.29. HCN deregressed best linear unbiased prediction (BLUP)  
110 shows a very high correlation with non-deregressed BLUP with Pearson's correlation coefficient of  
111 0.99, indicating a balanced replication of individuals among the studied population. See deregressed  
112 BLUPs (**Supplementary Table 3**).

113

#### 114 **GWAS analysis revealed two SNPs associated with HCN accumulation**

115 Single Nucleotide Polymorphisms (SNPs) calling using Tassel version 5, identified a total of  
116 343,707 variants of which 30,279 were selected for phasing and imputation. After imputation, a total of  
117 27,045 bi-allelic SNPs with an allelic correlation of 0.8 or above were kept for downstream analysis.  
118 The first three Principal Components (PCs) accounted for over 15.3% genetic variation (**Figure 1C-D**;  
119 **Supplementary Note1**).

120 To identify genetic correlation between HCN content and genotypic variation, mixed model  
121 Genome Wide Association Mapping (GWAS) was performed using GCTA software (Yang et al. 2011)  
122 with bonferroni correction as a test of significant SNPs. After the Bonferroni correction ( $-\log_{10}(0.05/27045)$   
123 threshold, 5.733117), two significant peaks were identified on chromosomes 14 and  
124 16 with 45 and 12 significant associated markers, respectively (**Figure 2A, Supplementary Table 4**).  
125 Subsequent regional linkage disequilibrium (LD) analysis on chromosome 16 gives a 3.6 Mb interval  
126 and local LD analysis gives a 248 Kb interval (with  $r^2$  threshold of  $> 0.8$ ) on which 6 genes are  
127 annotated (**Table 1, Supplementary Figure 1A**). The optimal strongest *p-value* indicates the SNP  
128 S16\_773999 (*p-value*: 7.53E-22) located within the Manes.16G007900 gene. Manes.16G007900 is  
129 annotated as a Multidrug and Toxic Compound Extrusion or Multi-Antimicrobial Extrusion protein  
130 (MATE). MATE transporters are a universal gene family of membrane effluxers present in all life  
131 kingdoms. MATE transporters have been implicated directly or indirectly in mechanisms of  
132 detoxification of noxious compounds and able to transport CG (Darbani et al. 2016). Interestingly,  
133 S16\_773999 SNP is predicted to induce a missense variant (A>G) in exon 4 (**Figure 2B - red star-**  
134 **gene model**). This mutation causes an amino acid change from Threonine to Alanine, predicted as  
135 deleterious. A second MATE gene (Manes.16G008000) located at 22Kb from the candidate MATE  
136 gene (**Figure 2B - annotation panel**) also shows a high LD (pairwise correlation of 0.96;  
137 **Supplementary Figure 2A**). The second MATE gene could be suggested as a paralog of our candidate  
138 gene following reported cassava genome duplication (Bredeson et al. 2016).

139 The second peak in chromosome 14 shows an association with  $\log p$ -values of 1.08e-08, gives  
140 an interval of 615 Kb and the local LD analysis reduced it to 274 Kb on which 3 genes are located  
141 (**Table 1, Supplementary Figure 1B**). The first candidate SNP indicates that S14\_6050078 (*p-value*  
142 1.08e-08) is located in Manes.14G074300, a gene coding for an integral membrane HPP family protein  
143 involved in nitrite transport activity (Maeda et al. 2014). In a recent study, Obata and colleagues (2020),

144 highlighted that linamarin, an abundant variant of CG in cassava, contains nitrogen and serves as a  
145 nitrogen storage compound (Obata et al. 2020) as previously hypothesized (Siritunga and Sayre 2004).  
146 This confirms previous observations that application of nitrate fertilizer to cassava plants increases  
147 cyanide accumulation in the shoot apex (K. Jørgensen et al. 2005). The second candidate SNP indicates  
148 that S14\_6021712 (*p-value* 7.32E-08) is located in Manes.14G073900.1, coding for a plasma membrane  
149 H(+)-ATPase. H+-ATPase mediated H+influx associated with AI-induced citrate efflux coupled with a  
150 MATE co-transport system (Zhang et al. 2017). Wu et al. (2014) found that transgenic *Arabidopsis*  
151 lines containing *Brassica oleracea* MATE gene had stronger citrate exudation coupled with a higher  
152 H+efflux activity than wild-type plants (Wu et al. 2014).

153 As a validation step, we used a subset of 523 unique individuals (from the core Panel of 1,536  
154 unique individuals [Ogbonna et al., in press]), with phenotypic and genotypic information to perform  
155 GWAS. Results (**Figure 4-LA Unique; Supplementary Table 5**) revealed the same loci (as was  
156 observed in the larger dataset of 1,246 individuals) associated with HCN variation in our initial GWAS  
157 dataset, indicating that the core unique panel represents the overall genetic variation for HCN in the  
158 Brazilian germplasm collection. However, it detected less significant loci (only 46%) than those  
159 detected using a dataset of 1,246 individuals. This indicates that additional small effects QTL were  
160 captured with the larger dataset conferring increased statistical power.

161 The alleles driving high cyanide at S16\_773999 and S14\_6050078 loci show dominance and  
162 additive patterns, respectively (**Figure 2C-D**); homozygotes with alternate alleles for both loci show  
163 higher cyanide content than heterozygotes, while homozygotes with reference alleles show lower  
164 cyanide. This indicates that cyanogenic cassava can be alternate allele homozygous or heterozygous at  
165 these loci, while acyanogenic cassava plants are more likely reference allele homozygous at these loci.  
166 Joint allelic substitution effects at the associated loci for cyanide did not show any interaction between  
167 the two loci as shown in **Supplementary Figure 1C**.

168

### 169 **Variance explained and evidence for Domestication in HCN reveals chromosome 16 as a good** 170 **candidate for KASP marker development**

171 To calculate narrow-sense heritability, the proportion of variance explained was calculated  
172 using parametric mixed model multiple kernel approach (Akdemir and Jannink 2015). Single kernel  
173 mixed model explained 0.41 of the marker based (narrow-sense heritability,  $h^2$ ) proportion of the  
174 variance for HCN across the genome. A multi kernel mixed model with the top significant SNPs in  
175 chromosome 16 and 14 (S16\_773999 and S14\_5775892) as the first and second kernel with the rest of  
176 the genome as the third kernel, explained 30%, 7% and 63% of the marker based variance respectively.  
177 A three kernel mixed model to determine the variance explained by chromosome 14, 16 and the rest of  
178 the genome, showed that the proportion of variance explained by the three kernels are 16%, 50% and  
179 34% respectively. Chromosome 14 and 16 tag SNPs for the candidate SNPs explains 8% and 36%  
180 proportions of variance, respectively; while the rest of the genome explains 56%. We found evidence



181 for local interactions within chromosome 16 which is most likely as a result of high LD around the  
182 region (**Supplementary Method1 for M&M**).

183 To validate the local interaction found in chromosome 16, we performed intra-chromosomal  
184 epistasis interaction using FaST-LMM (Lippert et al. 2011, 2013). Chromosome 16 revealed 242  
185 significant interactions above the bonferroni corrected threshold ( $-\log_{10}(0.05/1131*(1131-1)/2)$ ;  
186 1.6024), with three interactions clearly separated by 1 Mb between each pair of SNPs (**Supplementary**  
187 **Figure 1D; Table 2, Supplementary Table 9**). A biosynthetic gene cluster in cassava (Genome draft  
188 version Cassava4.1) was earlier identified by Andersen et al. (2000), which we identified to be on  
189 chromosome 12 in genome version 6.1 as shown in **supplementary figure 3A-B**. Inter-chromosomal  
190 epistasis interactions analysis involving about 400 million tests, did not reveal any significant  
191 interactions, neither for bonferroni or FDR threshold. Over 27 million tests had *p-values* less than 0.05  
192 significant level (**Supplementary Method2 for M&M**).

193 Investigating evidence for domestication in HCN, we carried out differentiating loci analysis  
194 using cassava HapMap reference lines (Ramu et al. 2017) for cultivated *M. esculenta* and wild *M.*  
195 *esculenta* ssp. *flabellifolia* (**Supplementary Table 6**). We identified 294 biallelic ancestry-informative  
196 single-nucleotide markers that represent fixed or nearly fixed differences between cultivated and wild  
197 accessions (**Supplementary Figure 4**). Interestingly, we observed high fixed loci (89) differentiating  
198 between the two groups in chromosome 16, of which over 54 of them are approximately 0.37 Mb away  
199 from the candidate MATE gene for HCN regulation (**Supplementary Figure 4**). Together these results  
200 indicate that (i) epistasis is observed within chromosome 16 around the main GWAS peak  
201 (**Supplementary Figure 1D**) and (ii) the identified epistatic region colocalizes with differentiating loci  
202 between *M. esculenta* and wild *M. esculenta* ssp. *flabellifolia* (**Supplementary Table 6**;  
203 **Supplementary Method3 for M&M**).

204 The Kompetitive Allele-Specific PCR assay (KASP) is a robust, high throughput and cost  
205 efficiency PCR based marker technology (He, Holme, and Anthony 2014; Neelam, Brown-Guedira,  
206 and Huang 2013). We used KASP to develop and validate diagnostic markers for HCN content, based  
207 on association peaks, local linkage disequilibrium and allelic effect. Candidate SNPs from the GWAS  
208 were subjected to KASP marker design (**Supplementary Table 7**) and assayed on Embrapa Breeding  
209 populations for a total of 576 individuals. The average percentage genotype score or call rate was  
210 96.59% with a maximum of 97.92% and a minimum of 92.71% validated across population and validate  
211 allelic segregation for HCN content (**Supplementary Table 8, Supplementary Method4 for M&M**).

212

### 213 **Phylogenetics and mutation predictions reveal altered function of MATE transporter**

214 To identify homologues of the MATE transporter Manes.16G007900, a protein alignment and  
215 comparative phylogeny analysis were performed for genome-wide MATEs in cassava, sorghum and  
216 *Arabidopsis* using CLUSTAL OMEGA (Sievers et al. 2011). Results showed a close sequence  
217 homology between three additional MATE transporters in the cassava genome: Manes.16G007900,

218 Manes.17G038400, Manes.17G038300 and Manes.16G00800 with percentage identity of 91.09%,  
219 78.05%, 68.59%, respectively. Highest interspecific homology analysis found SbMATE2 from  
220 sorghum (Sobic.001G012600; percentage identity of 67.84% [first isoform] and 71.00% [second  
221 isoform]) (Darbani et al. 2016) and AtMATE from *Arabidopsis* (AT3G21690; percentage identity of  
222 72.80%) (Liu et al. 2009), characterized as vacuolar membrane transporters (**Figure 3A,**  
223 **Supplementary Note2 on Phylogeny Tree**). Manes.16G007900 and Manes.16G00800 predicted  
224 topology of 12 transmembrane helices supporting their annotation (**Supplementary Figure 5A-B**), as  
225 previously reported for *Arabidopsis* (Li et al. 2002), *sorghum* (Darbani et al. 2016) and blueberry (Chen  
226 et al. 2015) (**Supplementary Method5 for M&M**). Maximum likelihood tree using protein sequences  
227 from 241 HapMap individuals displayed distinct clade distribution of 64 homozygote individuals for  
228 SNP S16\_773999 G:G allele (high Cyanide) in color red and 114 homozygotes for SNP S16\_773999  
229 A:A allele (low Cyanide) in green color. *M. esculenta* ssp. *flabellifolia* individuals (homozygote G:G)  
230 and other wild accessions *M.glaziovii* and *M.pruinosa* (homozygote A:A) clustered in distinct clades  
231 (**Figure 3B**).

232 The stability of a protein to denaturation is calculated by measuring changes in free energy, and  
233 the higher and more positive the change in the free energy is, the more stable the protein is against  
234 denaturation (Quan, Lv, and Zhang 2016). We mined 36 single point mutation predictions in GBS and  
235 whole genome resequencing data (Ramu et al. 2017) for Manes.16G007900 and Manes.16G008000  
236 proteins. In the observed 36 single point mutations across the two proteins, this value ranges from 0.26  
237 to -4.00 with an average of -1.57 (**Supplementary Figure 5C(1-4), Method6, Table 10**). The  
238 deleterious point mutations showed higher negative values in their structural change prediction.  
239 Mutations with sensitive stability changes can affect the motion and fluctuation of the target residues.  
240 All 36 point mutations except one (**Figure 2B, middle panel**), had a negative change in free energy,  
241 indicating loss of stability conferring fluctuations in the protein function (**Supplementary Method6**  
242 **for M&M**).

243

244

### 245 **Sweet and Bitter cassava Geographical Distribution**

246 We represented the geographical distribution and HCN content of Brazilian germplasm,  
247 recently characterized (Ogbonna et al, in press) and presented a contrasted distribution (Figure 4A).  
248 Accessions with high cyanide contributing alleles are grouped mostly around the Amazonas and low  
249 cyanide contributing alleles are grouped in other areas of Brazil. Specifically, individuals with high  
250 cyanide are mostly found around the Amazonian rivers and the coastal areas while more variation in  
251 HCN content was observed in other regions of Brazil. The ancestry coefficient distribution for  
252 S16\_773999, S14\_5775892 and joint haplotypes (S16\_773999 and S14\_5775892) revealed 3 different  
253 ancestry coefficients for the candidate SNP S14\_5775892 (Figure 4B) following an additive response  
254 (Figure 2C). Two different ancestry coefficients were observed for the candidate SNP S16\_773999

255 (Figure 4C) following the complete dominant response observed (Figure 2D). Pseudohaplotype of  
256 candidate SNPs in chromosome 14 and 16 shows the distribution of 3 ancestry coefficients (Figure 4D),  
257 indicating low, intermediate and high cyanide ancestry coefficients (**Supplementary Method7 for**  
258 **M&M and Note3 for Discussion**).

259 Leveraging from open source data (available at [cassavabase.org](http://cassavabase.org), see **Supplementary Method8**  
260 **for M&M**), we explored the distribution of cyanide across sub-Saharan Africa datasets, including  
261 assayed individuals originating from 26 countries (**Supplementary Table 11, Supplementary Figure**  
262 **6A**) and field trials carried out in different locations across Nigeria. This analysis indicated that Central  
263 and Southern Africa showed on average higher cyanide varieties compared to West Africa  
264 (**Supplementary Figure 6B**), while a trend of lowering cyanide was detected on landraces compared  
265 to improved varieties (**Supplementary Figure 6C**).

266

### 267 **Validating GWAS results in African and Joint Africa, Latin America population**

268 Phenotypic distribution and variation for cyanide content was measured in African population  
269 of 636 individuals using the picrate titration method. Cyanide concentration varies from 1 to 9 with an  
270 average of 5.1 in the African population (**Supplementary Table 12**).  $H^2$  and  $h^2$  for cyanide content  
271 were 0.27 and 0.26 respectively, less than observed in Brazilian germplasm (**Supplementary Table 2**).  
272 The genotype variance ( $V_g$ ) was higher than genotype-by-environment variance ( $G_{gxe}$ ) with their ratio  
273 ( $V_{gxe} / V_g$ ) showing a high interaction of 0.86. The estimated deregressed BLUPs ranged from 0.0009  
274 to 2.5638 with an average of 0.5242 (**Supplementary Table 13**). After the Bonferroni correction (-  
275  $\log_{10}(0.05/53547)$  threshold, 6.029765), two significant peaks were identified on chromosomes 14 and  
276 16 respectively (**Figure 5 AF-panel; Supplementary Table 14**). A third peak was observed in  
277 chromosome 11 but was not up to the significant threshold. GWAS dataset for HCN in African  
278 accessions showed peaks on chromosome 14 and 16 with SNP S14\_6612442 and SNP S16\_1298874  
279 showing the highest  $p$ -values, congruent with the Brazilian GWAS dataset.

280 For Africa and Latin America combined analysis, phenotypic variation ranged between 1 to 9  
281 with an average of 5.2 (**Supplementary Table 15**).  $H^2$  and  $h^2$  heritability for cyanide content in Africa  
282 and Brazilian combined analysis was 0.50 and 0.38 respectively. The genotype variance ( $V_g$ ) was higher  
283 than genotype-by-environment variance ( $G_{gxe}$ ) with a ratio ( $V_{gxe} / V_g$ ) showing a lower interaction of  
284 0.42 compared to that of African population alone (**Supplementary Table 2**). The estimated  
285 deregressed BLUPs (for the 1,875 individuals used in GWAS) ranged from 0.0027 to 4.2266 with an  
286 average of 1.2545 (**Supplementary Table 16**). After the Bonferroni correction, two significant peaks  
287 were identified on chromosomes 14 and 16 respectively, corresponding to the earlier reported candidate  
288 SNPs (**Figure 5 LA+AF-panel; Supplementary Table 17**). A whole genome imputation of the  
289 African-Brazilian dataset using the hapmap as a reference panel for chromosome 16 (**Supplementary**  
290 **Figure 7A**), further validate Manes.16G007900 and the associated SNP S16\_773999, based on optimal



291 *p*-value (4.74E-22) (**Supplementary Table 18; Supplementary Method8 for M&M**). See  
292 distributions of phenotypes and deregressed BLUPs (**Supplementary Figure 8**).

293 We requested available open source RNA-sequencing dataset on the molecular identities for 11  
294 cassava tissue/organ types using the TMEB204 (TME204) cassava variety to evaluate gene expression  
295 (Wilson et al. 2017). Both Manes.16G007900 and Manes.16G008000 showed differential expression  
296 between storage and fibrous root with *p*-values of 5.00E-05 and 0.00065, respectively (**Figure 6A-B**).  
297 Manes.16G007900 is differentially expressed between fibrous root and leaf with FPKM values of  
298 13.9219 and 89.5362 respectively, whereas Manes.16G008000 is not and shows low expression level  
299 (**Figure 6A-B**). Selective sweeps detection using HapMap WGS between cassava progenitors, Latin  
300 American and African accessions do not show sweeps overlapping with candidate and biosynthetic  
301 regions (**Supplementary Figure 9&10**).

302

303

304 Discussion

305

306 The potential of CG content in cassava varieties varies, even among the roots of the same plant  
307 (Gleadow and Møller 2014). These variations are partly due to genetics, environmental conditions and  
308 soil type (Bokanga et al. 1994; K. Jørgensen et al. 2005; Nzwalo and Cliff 2011). While germplasm  
309 from Latin America shows higher genetic variance and heritability (Brazil,  $V_g=2.59$ ,  $H^2=0.82$ ,  $h^2=0.41$ ;  
310 Colombia,  $V_g=1.58$ ,  $H^2=0.69$ ), their African counterparts showed much less genetic variance and  
311 heritability ( $V_g=0.21$ ,  $H^2=0.27$ ,  $h^2=0.26$ ). Latin America/Brazil is the primary center of domestication  
312 from where cassava was solely introduced in the XVI century into Africa, which could explain a  
313 probable genetic bottleneck and the observed difference between the two populations (Bredeson et al.  
314 2016). In addition, sweet and bitter cassava landraces are differentiated in Latin America but not in  
315 Africa. This is attributed to post-introduction hybridization between sweet and bitter cassava and the  
316 inconsistent transfer of ethnobotanical knowledge of use-category management to Africa (Bradbury et  
317 al. 2013). Mislabeling of germplasm in Africa (Yabe, Iwata, and Jannink 2018) may also have  
318 contributed to the observed difference. These differences were also observed with the distribution plots  
319 for the individuals assayed in our analysis for HCN in Latin American (bimodal distribution) and  
320 African (almost normally distributed) populations. The observed differences between broad and  
321 narrow-sense heritability estimates, attributed to missing heritability, could be explained by the local  
322 epistasis interactions involving few major genes explaining the variance for HCN in chromosome 16  
323 (Akdemir and Jannink 2015), the large numbers of rare variants omitted through imputation (Yang et  
324 al. 2015) and the use of only bi-allelic subsets of filtered SNPs, leaving behind multi-allelic loci that  
325 may have explained additional variance.

326 Previous studies on the genetic architecture of HCN, found two QTL linked to loci SSRY105  
327 and SSRY242 explaining 7 and 20% of the genetic variation in an  $S_1$  population (Kizito et al. 2007).

328 Blasting the sequences of the loci, revealed SSRY105 location on chromosome 14 (57,582,253 bp) of  
329 cassava genome version 6.1 (<http://phytozome.jgi.doe.gov>) and was congruent with the region found  
330 on chromosome 14 associated with HCN variation in our current datasets. Whankaew et al. (2011),  
331 found five QTL (CN09R1, CN09R2, CN09L1, CN09L2, CN08R1) across two environments and years,  
332 but without any consistent QTL. Their corresponding locations on cassava genome version 6.1 were  
333 chromosomes 12 (CN09R1), 9 (CN09L1), 3 (CN09L2), and 4 (CN09R2). The sequence of SSRY242  
334 and CN08R1 QTL could not be found to specify their locations in the genome. These studies could not  
335 provide a comprehensive information on the genetic basis for root cyanide variation in cassava given  
336 that; (1) cyanide content is affected by environment, (2) the use of population with distinct genetic  
337 background, (3) the stage of the field trials at which cyanide was assayed, and (4) the use of low marker  
338 density which limited the resolution and QTL detection power.

339 To provide comprehensive genetic architecture of HCN in cassava, we performed a GWAS  
340 using multi-year trials conducted in Brazil in 2016 through 2019 on individuals assayed for root cyanide  
341 using picrate titration method. Two major regions associated with HCN variation were identified in our  
342 dataset, the stronger one in chromosome 16 (within MATE efflux transporter coding region) and another  
343 in chromosome 14 (within an integral membrane HPP family protein and H<sup>+</sup> ATPase coding regions).  
344 The validation of the genetic architecture of HCN in an African population, joint GWAS analysis  
345 between Africa and Latin America (Brazil) and whole genome imputation of the African-Brazilian  
346 dataset using HapMap as a reference for chromosome16 confirms results and shows that the genetic  
347 architecture of cyanide is conserved (based on our datasets). Homozygous reference alleles at identified  
348 loci showing lower cyanide content is in agreement with the finding that acyanogenic plants are  
349 homozygous recessive at one of the loci (Gleadow and Møller 2014). However, such homozygous  
350 cassava variety was yet to be identified given that they are recessive and difficult to discover because  
351 of cassava polyploid make-up (Jennings and Iglesias, 2002). Cyanide is maintained in cultivated cassava  
352 populations from Africa and Latin America via the selection of high and low cyanide phenotypes under  
353 different environmental and herbivore pressures, leading to a balanced selection. This phenomenon has  
354 been previously reported for cyanide in white clover (Corkhill L. 1942), *Sorghum bicolor* (Hansen et  
355 al. 2003) and *trifolium* (Kakes 1997) for cyanide. More recently, selective sweeps results between  
356 cultivated and cassava progenitors suggested that selection during domestication decreased CG content  
357 (Ramu et al. 2017).

358 Genome wide phylogenetic analysis of MATE genes in cassava, sorghum and arabidopsis  
359 suggested homology between our candidate gene and SbMATE2, a characterized vacuolar membrane  
360 transporter in sorghum for cyanogenic glucoside dhurrin (**Figure 3A**). SbMATE2 functions in the  
361 accumulation of plant specialised metabolites such as flavonoids and alkaloids, and exports dhurrin and  
362 other hydroxynitrile glucosides, protecting against the self-toxic biochemical nature of chemical  
363 defence compounds. The transport of the pH-dependent unstable cyanogenic glucoside from its  
364 cytoplasmic site of production to the acidic vacuole likely contributes to reducing self-toxicity (Darbani

365 et al. 2016). Mechanistic studies on MATE transporters, such as sorghum SbMATE gene, strongly  
366 suggest that its transport cycle could be driven by proton and/or cation ( $H^+$  or  $Na^+$ ) gradients (Doshi et  
367 al. 2017). SbMATE shows high affinity for  $Na^+$  &  $H^+$ , and  $H^+$  constitute the main electrochemical  
368 driving force in plants, hence, it is likely that  $H^+$  constitutes the main coupling ion for SbMATE. Darbani  
369 et al. (2016), reported that the biosynthetic gene cluster for dhurrin additionally includes a gene  
370 encoding a MATE transporter and glutathione S-transferase gene for dhurrin uptake in sorghum bicolor.

371 Our study identified a MATE transporter on chromosomes 16 and the  $Na^+$  (from integral  
372 membrane HPP family protein) and a plasma membrane  $H^+$ -ATPase-coupled on chromosome 14, as  
373 involved in cyanide content regulation. In the cassava genome version 6.1, the cyanide biosynthesis  
374 gene cluster is located on chromosome 12 within 75 kb interval, including a couple of changes in  
375 orientation and gene arrangement (**Supplementary Figure 3B**). Interestingly, genome-wide epistasis  
376 study did not reveal interactions with other parts of the genome, including the biosynthesis gene cluster  
377 region on chromosome 12. This finding contrasts with sorghum, where cyanide biosynthesis and  
378 transport have been characterized within the same gene cluster (Darbani et al. 2016). This suggests a  
379 distinct evolutionary path for cyanide regulation in cassava than in sorghum. In view of this  
380 observation, we speculate that perhaps, cassava domestication targeted upstream or downstream genetic  
381 regulation steps of cyanide bio-synthesis. In cassava, CGs are synthesized in the shoot apex (Andersen  
382 et al. 2000) and then transported to the fibrous roots (Nartey 1968; Koch et al. 1992; K. Jørgensen et al.  
383 2005). Jørgensen et al (2005), reported a reduction of cyanogenic content in leaves of RNAi transgenic  
384 cassava plants, but not in the roots, indicating a tissue-specific regulation of cyanide accumulation in  
385 roots. Candidate Manes.16G007900 (chromosome16) showed local epistasis interaction with a 1.36Mb  
386 region located at 772055 - 775833 bp downstream. Epistatic effects that arise from alleles in gametic  
387 disequilibrium, between closely located loci can contribute to long-term response since recombination  
388 disrupts allelic combinations that have specific epistatic effects and the detection of epistasis is a key  
389 factor for explaining the missing heritability (Akdemir, Jannink, and Isidro-Sánchez 2017; Santantonio,  
390 Jannink, and Sorrells 2019). This region spans over 54 biallelic ancestry-informative single-nucleotide  
391 markers fixed or nearly fixed between *M. esculenta* and *M. flabellifolia* (Ogbonna et al, in press),  
392 suggesting that domestication can impact metabolic content targeting transport regulation (Wang et al.  
393 2019), as earlier reported in maize and rice (Sosso et al. 2015). In view of the above findings, we  
394 speculate that cassava domestication may have specifically targeted downstream genetic regulation  
395 steps of cyanide biosynthesis. This is supported by the fact that root size (starch storage) and cyanide  
396 content are the major traits of cassava domestication (Ramu et al. 2017). HCN is regulated in an  
397 oligogenic manner with two major loci explaining the variation across our datasets. To facilitate their  
398 use in breeding pipelines, SNPs tagging the major QTL loci were converted to robust, high-throughput  
399 and easy to use competitive allele-specific PCR (KASP) assays. The diagnostic markers for cyanide are  
400 available (**Supplementary Table 7**) to the global cassava improvement community through a  
401 commercial genotyping service provider under the High Throughput Genotyping Project

402 (<https://excellenceinbreeding.org/httpg>) via Intertek (<https://www.intertek.com>). We also observed that  
403 the closest homology observed for MATEs in cassava is in line with the results of the MATE protein  
404 alignment which displays the highest homology between MATE gene on chromosome 16 and  
405 chromosome 17 (Figure 3A). This is congruent with previously identified paleo tetraploidy in the  
406 cassava genome, where chromosomes 14 and 16 present partial conserved synteny with chromosome 6  
407 and 17, respectively (Bredeson et al. 2016). We found the candidate gene to be paralog (68.59%) with  
408 Manes.16G008000 and homeolog (91.09%) with Manes.17G038400, indicating that our candidate had  
409 undergone double duplication events. This finding would need further investigation to clarify the  
410 potential fate of the observed tandem duplication (ie: subfunctionalization, neofunctionalization).  
411 MATE candidate gene topology prediction suggests that our candidate MATE protein shares a similar  
412 topology in the membrane as those observed in the MATE protein family and functions as an efflux  
413 carrier that mediates the extrusion of toxic substances (Brown, Paulsen, and Skurray 1999; Morita et al.  
414 2000; Li et al. 2002). Further functional characterization of the putative cyanide transporters in cassava  
415 need to be performed.

416 Allele mining and mutation prediction (**Figure 2B**) on the HapMap dataset ensures that the  
417 current study captures the diversity of the HapMap panel. Moreover, DNA sequence analysis of  
418 Manes.16G007900 across HapMap individuals shows that *M. esculenta* ssp. *flabellifolia* individuals are  
419 preferentially homozygous G:G (high cyanide allele) for candidate SNP S16\_773999, which is in line  
420 with its phenotypic characterization for cyanide content by Perrut-Lima and colleagues (Perrut-Lima,  
421 Mühlen, and Carvalho 2014). Interestingly, for the same candidate SNP, *M. glaziovii* and *M. pruinosa*  
422 individuals gene sequences are all homozygous A:A (low cyanide alleles) and cluster separately from  
423 *M. esculenta* subsp. *flabellifolia* (**Figure 3B**). However, sweeps on HapMap data groups (Latin  
424 American, African and progenitors) did not reveal selective sweeps associated with GWAS loci and  
425 biosynthesis clusters. Phenotypic spatial distribution analysis results for sweet and bitter cassava in  
426 Brazil, suggested clinal variation occurred along subregions gradient separating ancestral coefficients  
427 across ecoregions and agrees with the candidate marker response in the region regulating cyanide  
428 variation in cassava. This reflects the role environmental conditions and herbivore pressure had played  
429 on cyanide regulation and its synergy in maintaining balanced selection of cyanide traits in cassava (**see**  
430 **further discussion: Supplementary Note3**).

431

## 432 Conclusion

433 In this study, we deciphered the genetic architecture of cyanide in cassava and mapped the  
434 genetic region in chromosome 16 and 14. The GWAS peak in chromosome 16 is strongly associated  
435 with the coding region of a MATE efflux protein, a transporter able to transport cyanogenic glucosides.  
436 In addition, the peaks on chromosome 14 is associated with the coding region of an integral membrane

437 HPP family protein involved in Nitrite Transport Activity and a plasma membrane H<sup>+</sup>-ATPase mediated  
438 H<sup>+</sup> influx which potentially associated with MATE to participate in a cyanide glucosides cotransport  
439 system.

440 Haplotype defined from the region in chromosome 16 and 14 explained 36 and 8% of the total  
441 variance explained by the markers, while loci associated with the optimal p-values explained 30 and  
442 7% variance respectively. Selected individuals carrying the alleles for high and low cyanide in  
443 chromosomes 16 and 14 were further validated by designing KASP markers for breeding applications.  
444 This approach also found the same regions explaining the variance in an African dataset for cyanide, a  
445 joint dataset for African and Latin American germplasm and a whole genome imputation of the African-  
446 Brazilian dataset for chromosome 16, validating the candidate SNP. Sweet and bitter cassava  
447 distribution have maintained pre-conquest distribution in Brazil, with breeding activities around  
448 Northern and Central regions creating a more balanced population with low, intermediate and high  
449 cyanide clones.

450 The broader impact of this study was to understand the genetic mechanism of cyanide  
451 regulation in cassava root and the identification of closely linked SNP markers to enhance efficiency  
452 and cost effectiveness through marker assisted selection. Further steps can include (1) deployment of  
453 diagnostic markers for breeding applications; (2) develop co-expression studies to further assess the  
454 source/sink relationship of cyanide metabolism in multi-environmental conditions on impact of low  
455 cyanide on pest and disease control in cassava. (3) breeding and introduction of low cyanide cassava  
456 varieties that are high yielding and disease resistant to regions often affected by agricultural and health  
457 related crisis such as konzo, especially in sub-Saharan Africa. Altogether the present study consolidates  
458 our understanding of the genetic control of HCN variation in cassava and provides new insights using  
459 genomics of diverse genetic background populations.

460

461

462

463 Material and Method

464

#### 465 **Plant material**

466 A first dataset including a total of 1,389 accessions from the Cassava Germplasm Banks (CGB)  
467 of Brazilian Agricultural Research Corporation (Embrapa), located in Cruz das Almas, Bahia, Brazil  
468 were used for this study (**Figure 1B**). The region is tropical with an average annual temperature of  
469 24.5°C, relative humidity of 80%, and annual precipitation of 1,250 mm. The germplasm were collected  
470 from different cassava growing regions and ecosystems of Brazil, and consisted of land races and  
471 modern breeding lines (de Oliveira et al. 2014; Albuquerque et al. 2018).



472 A second data including 1,363 African accessions was obtained from the open source cassava  
473 breeding database, cassavabase.org. This dataset comprises plant material from the International  
474 Institute of Tropical Agriculture (IITA).

475

#### 476 **DNA extraction**

477 DNA extraction was performed following protocol described in Albuquerque et al  
478 (Albuquerque et al. 2018) and Ogonna et al (in press) on the Embrapa CGB collection. Briefly, from  
479 young leaves according to the CTAB protocol (cetyltrimethylammonium bromide) as described by  
480 Doyle and Doyle (1987). The DNA was diluted in TE buffer (10 mM Tris-HCl and 1 mM EDTA) to a  
481 final concentration of 60 ng/ $\mu$ L, and the quality was checked by digestion of 250 ng of genomic DNA  
482 from 10 random samples with the restriction enzyme *EcoRI* (New England Biolabs, Boston, MA).

483

#### 484 **Genotyping**

485 Genotyping, imputation, filtering methods and parameters were performed as described in Ogonna et  
486 al (in press). Briefly, Genotyping-By-Sequencing (Elshire et al. 2011) was conducted using the *ApeKI*  
487 restriction enzyme (Rabbi et al. 2014) and Illumina sequencing read lengths of 150 bp. Marker  
488 genotypes were called with the TASSEL GBS pipeline V5 (Glaubitz et al. 2014) using cassava  
489 reference genome version 6.1 available on Phytozome (<http://phytozome.jgi.doe.gov>). After filtering  
490 (mean depth values >5, missing data < 0.2 and minor allele frequency <0.01 per loci) and Imputation  
491 ( $AR^2 > 0.8$ ) (Browning and Browning 2009), remaining markers were retained for downstream analysis.

492

#### 493 **Phenotyping**

##### 494 **Brazilian dataset:**

495 Phenotypic data were collected on 1,389 accessions over 4 trials in a single location with 3  
496 replications each in 2016, 2017, 2018 and 2019. A total of 1,246 accessions had both phenotypic and  
497 genotypic information and were retained for further analysis. Cyanide content was measured using  
498 picrate titration methods (M. G. Bradbury, Egan, and Howard Bradbury 1999) as earlier described by  
499 Fukuda et al. (2010). Briefly, it involves a qualitative determination of HCN potential in cassava root,  
500 and given that HCN potential varies considerably in plants, we assayed 5 to 6 plants in a plot and 3  
501 roots per plant. Cross sectional 1 cm<sup>3</sup> cut is made at mid-root position for each root, between the peel  
502 and the center of the parenchyma. The cut root-cube and 5 drops of toluene (methylbenzene or phenyl  
503 methane) are added to a glass test tube respectively and tightly sealed with a stopper. To determine the  
504 qualitative score of HCN potential on a color scale of 1 to 9, a strip of whatman filter paper is dipped  
505 into a freshly prepared alkaline picrate mixture until saturation. The saturated filter paper is then placed  
506 above the cut root cube in the glass tube and tightly sealed for 10 to 12 hours before recording the color  
507 intensity (Maziya-Dixon, Dixon, and Adebawale 2007). See **Supplemental Table 1** for a HCN assay  
508 for Brazilian germplasm across four years.

##### 509 **African and Colombian datasets:**

510 African phenotypic data was collected from a breeding database cassavabase  
511 (<https://cassavabase.org>) and include 18 locations, 23 years and 393 trials for a total of 8,244 accessions  
512 for a total of 33,523 observations from the Institute of Tropical Agriculture (IITA) (**Supplementary**  
513 **Figure 8C**). Colombian phenotypic data includes 41 locations, 11 years and 155 trials for a total of  
514 13,111 observations from the Centro Internacional de Agricultura Tropical (CIAT). The Phenotyping  
515 protocol was performed using the same protocol as for the Brazilian dataset. A total of 636 unique  
516 accessions with phenotypic and genotypic information from 228 trials were retained for further analysis  
517 for the African dataset.

518

### 519 **Statistical Analyses**

520 Trials across years were combined and BLUPs were estimated for each clone from 9,138  
521 observations on 1,389 genotypes for HCN. We used the lme4 (Bates et al. 2015) package in R (R. Core  
522 Team 2015) version 3.4.2 (2017-09-28) to fit a mixed linear model (MLM) following the method  
523 described in (Wolfe et al. 2016):  $Y_{ijkl} = \mu + c_i + \beta_j + r_k + d_l + \epsilon_{ijkl}$ , where  $\epsilon_{ijkl} \sim N(0, \sigma_\epsilon^2)$   
524 is the residual variance and assumed to be randomly distributed,  $Y_{ijkl}$  represents the phenotypic  
525 observations,  $\mu$  is the grand mean,  $c_i$  is the random effects for clone with  $c_i \sim N(0, \sigma_c^2)$ ,  $\beta_j$  is a random  
526 effect for clone nested in combination of year,  $r_k$  is a random effect for combination of year and rep  
527 and assumed to be normally distribution with  $N(0, \sigma_k^2)$  and  $d_l$  is a fixed effect for years. Variance  
528 components from our mixed model were used to compute the broad-sense heritability according to the  
529 method described in (Holland, Nyquist, and Cervantes-Martínez 2010) Briefly,

530 
$$H^2 = \frac{\sigma_c^2}{\sigma_c^2 + \frac{\sigma_t^2}{\bar{t}} + \frac{\sigma_r^2}{\bar{r}} + \frac{\sigma_\epsilon^2}{\bar{p}}}$$
, where  $\sigma_c^2$  is the clone variance,  $\sigma_t^2$  is variance due to clone by year,  $\sigma_t^2$  is  
531 the variance due to years by replications and  $\sigma_\epsilon^2$  is the variance due to error. While  $\bar{t}$ ,  $\bar{r}$  and  $\bar{p}$  are the  
532 harmonic mean number of years, replications and plots in which the clone was observed, respectively.  
533 Given that the number of observations per clones varies across the four years dataset (replication varies  
534 from 1 to 9 with an average of 6), bias induced by pre-correction and induced-heterogeneous residual  
535 variance (de Los Campos et al. 2013), estimated BLUPs (differentially shrunken to the mean) were  
536 deregressed using:

537 
$$\text{deregressedBLUP} = \frac{BLUP}{1 - \frac{PEV}{\sigma_i^2}}$$

538 Where  $PEV$  is the prediction error variance for each clone and  $\sigma_i^2$  is the variance for the clonal  
539 component. **Supplementary Figure 8** shows the deregressed BLUPs distribution that was further used  
540 in the GWAS.

541

542 **GWAS analysis:**

543 We carried out a mixed model Genome Wide Association Mapping using GCTA software  
544 (Yang et al. 2011). Specifically, we used the mixed linear model based association analysis with the  
545 chromosome, on which the candidate SNP is located, excluded from calculating the genetic relationship  
546 matrix (GRM). The model is  $y = a + bx + g^- + e$  where  $y$  is the deregressed-BLUP estimate,  $a$  is  
547 the mean term,  $b$  is the additive effect (fixed effect) of the candidate SNP to be tested for association,  $x$   
548 is the SNP genotype indicator variable,  $g^-$  is the accumulated effect of all SNPs except those on the  
549 chromosome where the candidate SNP is located, and  $e$  is the residual. We plotted Manhattan with the  
550 Bonferroni threshold used as association tests of significant SNPs and compared the observed  $-\log_{10}(p$ -  
551 value) against the expected using the quantile-quantile plot. Local LD analysis will be performed on  
552 GWAS significant region based on  $r^2$  threshold of  $> 0.8$  to identify candidate genes. GWAS was also  
553 performed on a unique set of 1,536 individuals (GU panel) from Ogonna et al., (in press). This unique  
554 set was selected based on duplicate (identity-by-state) analysis on the total population of 3,354  
555 individuals to ensure efficient germplasm and resource management at the Brazilian cassava program  
556 and to balance individual genetic contribution to population structure definition (Ogonna et al., In  
557 press).

558

### 559 **Candidate Gene Analysis**

560 To investigate further GWAS candidate regions, we used the genomic resource from the  
561 cassava HapMap data (Ramu et al. 2017) to perform allele mining and predict genome-wide allelic  
562 mutation effect using SNPeff (Cingolani et al. 2012) and SIFT (Kumar, Henikoff, and Ng 2009).

563

### 564 **Phylogenetic analysis of candidate gene sequence**

565 We obtained MATE whole genome protein sequences from *Arabidopsis thaliana* (v.10),  
566 *Sorghum bicolor* (v3.11) and *Manihot esculenta* (v.6.1) genomes from phytozome  
567 (<https://phytozome.jgi.doe.gov/pz/portal.html>). The sequences were submitted to the transporter TP  
568 prediction tool (<http://bioinfo3.noble.org/transporter/>) for membrane domain identification and gene  
569 curation according to the TCDB guidelines (Saier et al. 2016). Sequences were aligned with CLUSTAL  
570 OMEGA (Sievers et al. 2011) and a phylogenetic analysis was performed using a Neighbour-joining  
571 tree without distance corrections (**Supplementary Sequence Data, Supplementary Multiple**  
572 **Alignment**). In addition, we generated MATE candidate, Manes.16G007900, protein sequences from  
573 the cassava hapmap (Ramu et al. 2017). Briefly Manes16.G007900 annotated variants from HapMap II  
574 (<ftp://ftp.cassavabase.org/HapMapII/>) were used to generate coding sequences (CDS) and translated  
575 protein sequence for each 241 accessions in a fasta format. Subsequent alignment and maximum-  
576 likelihood phylogenetic trees were generated using MAFFT (Katoh and Standley 2013) and PhyML  
577 (Guindon et al. 2010) through the NGphylogeny portal (Lemoine et al. 2019).

578

## 579 Supplemental Data

580 The following supplemental materials are available.

581

582 **Supplementary Figure 1.** Manhattan plot and LD plots for chromosomes 16 and 14.

583 **Supplementary Figure 2.** Pearson correlation of top 5 significant SNPs.

584 **Supplementary Figure 3.** Schematic representation of the clustering of cyanogenic glucoside  
585 biosynthetic genes.

586 **Supplementary Figure 4.** Differentiating loci between cultivated and cassava progenitor.

587 **Supplementary Figure 5.** TMHMM posterior probability for transmembrane Protein and mutation  
588 prediction.

589 **Supplementary Figure 6.** Distribution of sweet and bitter cassava in Sub-Saharan Africa.

590 **Supplementary Figure 7.** Manhattan plot for whole-genome imputed chromosomes 16.

591 **Supplementary Figure 8.** Distribution of HCN assayed for Latin American and African.

592 **Supplementary Figure 9.** Selective sweeps between cassava Progenitors and Latin American.

593 **Supplementary Figure 10.** Selective sweeps between Latin American and African cassava.

594 **Supplementary Figure 11.** Genetic (cM) vs. Physical (bp) positions.

595 **Supplementary Table 1.** Raw HCN dataset from Latin America (Embrapa-Brazil).

596 **Supplementary Table 2.** Summary statistics, variance components and broad-sense heritability for  
597 HCN.

598 **Supplementary Table 3.** 1,389 BLUPs for Latin American (Embrapa-Brazil) dataset and the list of  
599 1,246 BLUPs with genotype information used for GWAS.

600 **Supplementary Table 4.** Significant SNPs from Latin American dataset (Embrapa-Brazil).

601 **Supplementary Table 5.** Significant SNPs from GWAS on 523 Unique individuals.

602 **Supplementary Table 6.** Cultivated and Cassava Progenitor Differentiating loci comparison; *M.*  
603 *esculenta*, *M. esculenta* ssp. *flabellifolia*.

604 **Supplementary Table 7.** Designed KASP Marker Sequences.

605 **Supplementary Table 8.** HCN kaspar ségrégation results.

606 **Supplementary Table 9.** 242 Significant epistasis interactions pair of SNPs higher than bonferroni  
607 correction threshold (2 way test result).

608 **Supplementary Table 10.** Single point mutation prediction for Manes.16G007900 and  
609 Manes.16G008000

610 **Supplementary Table 11.** List of Countries and regions in Sub-Saharan Africa with their average  
611 BLUP values.

612 **Supplementary Table 12.** Raw African dataset phenotypes.

613 **Supplementary Table 13.** African BLUPs used for GWAS analysis.

614 **Supplementary Table 14.** Significant SNPs from African Germplasm GWAS analysis.

615 **Supplementary Table 15.** Raw African (IITA) and Latin American (Embrapa) phenotypes.

616 **Supplementary Table 16.** 1882 Combined BLUPs for Africa (IITA) and Latin America (Embrapa)  
617 GWAS.

618 **Supplementary Table 17.** Significant SNPs from African and Brazil Germplasm.

619 **Supplementary Table 18.** Significant SNPs from Whole Genome Imputation of chromosome 16  
620 GWAS using HapMapII and raw GBS dataset. 5000 SNP window was used.

621 **Supplementary Sequence Dataset.** Whole-genome sequence dataset for all MATE genes in Cassava,  
622 Arabidopsis and Sorghum.

623 **Supplementary Multiple Sequence Alignment.** Multiple sequence alignment for all MATE genes in  
624 Cassava, Arabidopsis and Sorghum.

625 Supplementary Method 1 Proportion of Variance Explained by Markers

626 Supplementary Method 2 Genome-wide Epistasis Interactions

627 Supplementary Method 3 Cultivated and Cassava Progenitor Differentiating Loci Analysis

628 Supplementary Method 4 KasparMarker Design and Assessment

629 Supplementary Method 5 Candidate gene protein Topology and Structure Prediction.

630 Supplementary Method 6 Single Point Mutation Prediction

631 Supplementary Method 7 Geographical Distribution of HCN

632 Supplementary Method 8 GWAS in African Population and Joint Africa, Latin America Analysis  
633 Supplementary Note 1 Population Structure Analysis  
634 Supplementary Note 2 Phylogenetic tree  
635 Supplementary Note 3 Sweet and Bitter cassava Geographical Distribution

636  
637

#### 638 **Availability of data and material**

639 Genotyping (SNP) data used in this study were deposited on cassavabase.org hosted at  
640 “[ftp://ftp.cassavabase.org/manuscripts/Ogbonna\\_et\\_al\\_2020/gwas\\_manuscript](ftp://ftp.cassavabase.org/manuscripts/Ogbonna_et_al_2020/gwas_manuscript)”.

641

#### 642 **Acknowledgements**

643 The authors appreciate Jean-Luc Jannink and Deniz Akdemir both from Cornell University, Ithaca, NY  
644 for their invaluable advice. The authors thank Kelly Robbins and Victoria Gomez for reviewing this  
645 manuscript. We are grateful to Embrapa Cruz das Almas breeding team for field experiment  
646 management. We thank the IITA cassava team and particularly Alfred Dixon, Peter Kulakow, Prasad  
647 Peteti, cassava breeders and data manager for making the historical African dataset publicly available.  
648 We thank the CIAT Breeding team and breeder Hernan Ceballos for making the historical Colombian  
649 dataset publicly available. This work was supported through Boyce Thompson Institute for plant science  
650 in collaboration with Embrapa Mandioca e Fruticultura of Brazil and partially supported by the  
651 NEXTGEN Cassava project, through a grant to Cornell University by the Bill & Melinda Gates  
652 Foundation and the UK Department for International Development.

653

#### 654 **Authors Contributions**

655 Designed experiment: AO, EJO, GB; Performed experiment: AO, GB, LBRA. Project supervision: LM,  
656 GB, EJO; First draft of the manuscript: AO; IYR provided technical assistance. GB and EO agree to  
657 serve as authors responsible for contact and ensure communication. All authors reviewed and approved  
658 the manuscript.

659

660

661

662

663

664

665

666

667



668 **Tables**

669

670 **Table 1.** Summary of linkage disequilibrium analysis within the regions (chromosomes 14 and 16)  
 671 associated with HCN variation in cassava for Brazilian germplasm.

| <b>Chromosome</b> | <b>GWAS-LD Intervals</b> | <b>High LD Intervals (<math>r^2 &gt; 0.8</math>)</b> | <b>Main candidate gene</b> | <b>Annotation</b>                      |
|-------------------|--------------------------|------------------------------------------------------|----------------------------|----------------------------------------|
| 16                | 3.6 MB (409 genes)       | 248 KB (6 genes) 658264 to 800090 bp                 | Transporter                | Multidrug and Toxic Compound Extrusion |
| 14                | 615 KB (77 genes)        | 274 KB (3 genes) 5775892 - 6070331 bp                | ATPase protein             | plasma membrane H <sup>+</sup> -ATPase |

672

673

674

675 **Table 2.** Chromosome 16 interactions SNP Pairs for Separated (1 Mb apart) Epistasis Interactions in  
 676 Chromosome 16. SNP 1 and SNP 2 Showed Strong Significant Interactions. The table also contains  
 677 Single-Locus P-value for the interaction SNPs (SNP).  
 678  
 679

| <b>SNP 1</b> |                             | <b>SNP 2</b> |                             | <b>Interactions</b>        |
|--------------|-----------------------------|--------------|-----------------------------|----------------------------|
| <b>SNP</b>   | <b>Single-Locus p Value</b> | <b>SNP</b>   | <b>Single-Locus p Value</b> | <b>Interaction p Value</b> |
| S16_12540    | 1.00E-05                    | S16_1063230  | 4.31E-15                    | 5.207858e-10               |
| S16_1298874  | 2.01E-07                    | S16_12540    | 1.00E-05                    | 2.969058e-09               |
| S16_1298876  | 7.72E-08                    | S16_12540    | 1.00E-05                    | 8.371752e-10               |

680

681

682

683

684

685

686

687 **Table 3.** Summary of genes within the regions associated with HCN variation in Brazilian cassava.

| Chrom | SNP         | Position, bp | Allele | P-value  | Gene             | Name                                                                                    | Function                                                                                           | Reference                                                               |
|-------|-------------|--------------|--------|----------|------------------|-----------------------------------------------------------------------------------------|----------------------------------------------------------------------------------------------------|-------------------------------------------------------------------------|
| 16    | S16_773999  | 773999       | G/A    | 7.53E-22 | Manes.16G007900  | MATE efflux family protein.                                                             | Multidrug and Toxic Compound Extrusion                                                             | <a href="#">Darbani et al. 2016</a>                                     |
| 16    | S16_795990  | 795990       | A/T    | 2.41E-10 | Manes.16G008000  | MATE efflux family protein.                                                             | Multidrug and Toxic Compound Extrusion                                                             |                                                                         |
| 16    | S16_796041  | 796041       | T/A    | 1.36E-20 | Manes.16G008100  |                                                                                         |                                                                                                    |                                                                         |
| 16    | S16_800090  | 800090       | A/T    | 4.33E-21 | Manes.16G008200  | UPF0051 PROTEIN ABCI8, CHLOROPLASTIC-RELATED                                            | The incorporation of iron and exogenous sulfur into a metallo-sulfur cluster.                      |                                                                         |
| 16    | S16_698521  | 698521       | A/G    | 2.08E-16 | Manes.16G007000  | F-type H <sup>+</sup> -transporting ATPase subunit gamma (ATPF1G, atpG) (ATP synthase). | The sector of a hydrogen-transporting ATP synthase complex in which the catalytic activity resides |                                                                         |
| 16    | S16_658264  | 658264       | T/C    | 2.34E-16 | Manes.16G006300  | ANKYRIN REPEAT FAMILY PROTEIN.                                                          |                                                                                                    |                                                                         |
| 14    | S14_6050078 | 6050078      | G/A    | 1.09E-08 | Manes.14G0074300 | Integral membrane HPP family protein.                                                   | Involved in Nitrite Transport Activity.                                                            | <a href="#">Maeda et al. 2014</a>                                       |
| 14    | S14_5775892 | 5775892      | G/T    | 1.63E-08 | Manes.14G0071000 | K03355 - anaphase-promoting complex subunit 8 (APC8, CDC23).                            | Interacting selectively and non-covalently with any protein or protein complex.                    |                                                                         |
| 14    | S14_6021712 | 6021712      | A/T    | 7.32E-08 | Manes.14G0073900 | H(+)-ATPase ( The plasma membrane H <sup>+</sup> -ATPase)                               | Associated with the plasma membrane gradients coupled MATE co-transport system.                    | <a href="#">J. Zhang et al. 2017</a> and <a href="#">Wu et al. 2014</a> |

688

689

690

## 691 **Figure Legends**

692 **Figure 1.** Geographic distribution and population structure of Latin American (Brazilian) germplasm.  
693 **(A)** Distribution of assayed HCN. HCN assayed phenotype score ranges from 2 to 9. **(B)** Distribution  
694 of germplasm based Brazilian states. A total of 1,821 cassava accessions have valid geographic  
695 information. The green dots show where the accessions come from while the size of the dots represent  
696 the number of clones from that state. The black numbers show how many accessions were sampled  
697 from each location. Population structure reveals the first three axes of the principal component analysis  
698 (PCA) explains about 15.3% of the variations in the population of 1246 individuals, 9,686 SNPs after  
699 filtering for Hardy–Weinberg equilibrium and LD of 0.01 and 0.2 respectively. **(C)** shows the first and  
700 second axis, while **(D)** shows the first and the third axis.

701  
702 **Figure 2.** GWAS of HCN for LA germplasm. **(A)** Manhattan plot from a mixed linear model (MLM-  
703 LOCO) with the chromosome on which the candidate SNP is located, excluded from calculating the  
704 genetic relationship matrix (GRM). Bonferroni significance threshold is shown in red. A quantile-  
705 quantile plot is inserted to demonstrate the observed and expected  $-\log_{10}$  of P-value for HCN. The red  
706 circle indicates the candidate SNP. **(B)** LocusZoomplot shows the HCN chromosome 16 associated  
707 region ( $-\log_{10} P$  value) around the candidate gene. Top two lines show genomic coverage at the locus,  
708 with each vertical tick representing directly genotyped from GBS and HapMap SNPs. Each circle  
709 represents a SNP, with the color of the circle indicating the correlation between that SNP and the  
710 candidate SNP at the locus (purple). Light blue lines indicate estimated recombination rate (hot spots)  
711 in GBS. The middle panel shows 36 single point mutations (red are deleterious) between the region  
712 spanning ccMATE1 and ccMATE2. Bottom panel shows genes at each locus as annotated in the cassava  
713 genome version 6.1. The red and black rectangle indicate Manes.16G007900 and Manes.16G008000  
714 gene respectively, with Pearson correlation coefficient of 0.96 ( $r^2$ ) between both genes. The lower figure  
715 is the gene model with the position indicated of the associated SNP within the 4th exon. **(C and D)**  
716 Boxplot showing candidate SNP effect for HCN between each genotype class at the top markers,  
717 S14\_6050078 and S16\_773999, respectively.

718  
719 **Figure 3.** Phylogeny analysis. **(A)** Protein sequences alignment of MATE genes in cassava, sorghum  
720 and Arabidopsis. Protein Alignment and comparative phylogeny show a close sequence homology  
721 between the GWAS candidate gene and SbMATE2 (Sobic.001G012600), a characterized vacuolar  
722 membrane MATE transporter in Sorghum, functions in the accumulation of plant specialized  
723 metabolites such as flavonoids and alkaloids. **(B)** Genomic sequence of Manes.16G007900 for the 242  
724 HapMap accessions. Accessions highlighted in red are homozygous GG for SNP16\_773999, identified  
725 as having high HCN content. Accession highlighted in green are homozygous AA for SNP16\_773999,  
726 identified as low HCN content. Accessions in black are heterozygotes AG or GA for SNP16\_773999.

727  
728 **Figure 4.** Spatial distribution of ancestral coefficients for HCN candidate SNPs using 1,657 accessions.  
729 **(A)** Distribution of germplasm based on best linear unbiased prediction (BLUP) of HCN. Accessions  
730 with high cyanide contributing alleles are grouped around the Amazonas and low cyanide contributing  
731 alleles are grouped in other areas of Brazil. **(B)** Spatial distribution of allele frequency for HCN  
732 candidate loci in chromosome 14. **(C)** Spatial distribution of allele frequency for HCN candidate loci  
733 in chromosome 16. **(D)** Interactions of HCN candidate loci in chromosome 14 and 16.

734  
735 **Figure 5.** Manhattan plot from a mixed linear model (MLM-LOCO) with the chromosome on which  
736 the candidate SNP is located, excluded from calculating the genetic relationship matrix (GRM). The

737 MLM-LOCO summarizes the genome-wide association results for HCN in **Latin American (LA,**  
738 **Brazilian), African (AF), joint Latin American + African (LA+AF) and Latin American unique**  
739 **(LA UNIQUE)** germplasms. Bonferroni significance threshold is shown in red. A quantile-quantile  
740 plot is inserted to demonstrate the observed and expected  $-\log_{10}$  of P-value for HCN.

741  
742 **Figure 6. (A)** Manes.16G007900 and **(B)** Manes.16G008000 issues/organs expression profiles, three  
743 month after planting (FPKM) of African cassava accession TMEB204 (*Manihot esculenta*) sampled for  
744 gene expression (Wilson et al. 2017). TMEB204, an African variety, was assayed for HCN in a 1997  
745 field experiment carried out at IITA Mokwa location (Nigeria) and forms part of the individuals in our  
746 African dataset with average cyanide content of 5.67 (min=5, max=7). TMEB204 allelic profile for  
747 candidate SNP S16\_773999 on chromosome 16 is heterozygous, indicating dominance of  
748 Manes.16G007900 high cyanide alleles.

749  
750  
751  
752  
753  
754  
755  
756  
757  
758  
759  
760  
761  
762  
763  
764  
765  
766  
767  
768  
769  
770  
771  
772  
773  
774  
775  
776

777 Figure 1

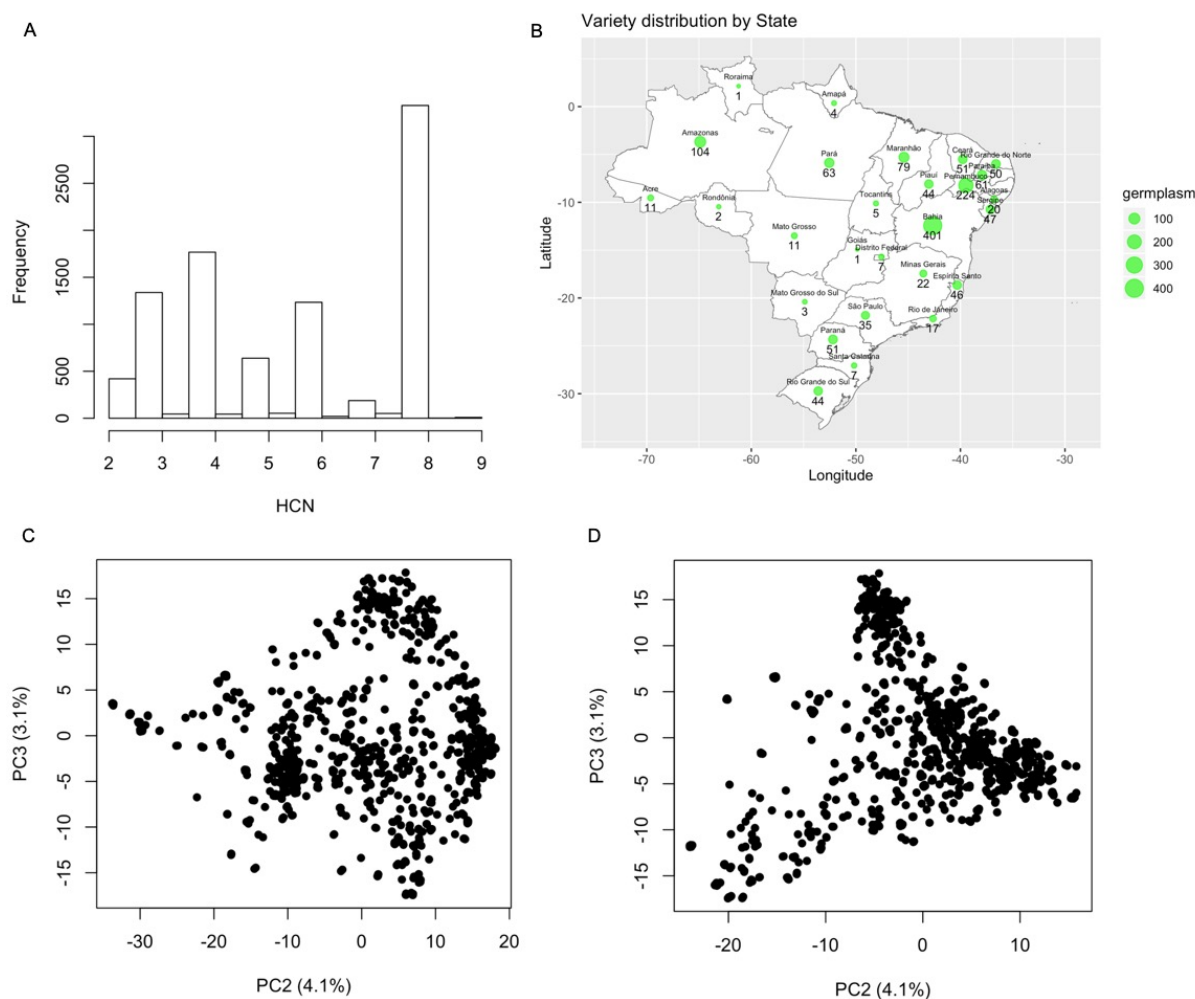

778

779

780 **Figure. 1.** Geographic distribution and population structure of Latin American (Brazilian) germplasm.  
 781 **(A)** Distribution of assayed HCN. HCN assayed phenotype score ranges from 2 to 9. **(B)** Distribution  
 782 of germplasm based Brazilian states. A total of 1,821 cassava accessions have valid geographic  
 783 information. The green dots show where the accessions come from while the size of the dots represent  
 784 the number of clones from that state. The black numbers show how many accessions were sampled  
 785 from each location. Population structure reveals the first three axes of the principal component analysis  
 786 (PCA) explains about 15.3% of the variations in the population of 1246 individuals, 9,686 SNPs after  
 787 filtering for Hardy–Weinberg equilibrium and LD of 0.01 and 0.2 respectively. **(C)** shows the first and  
 788 second axis, while **(D)** shows the first and the third axis.

789

790

791

792

793

794

795

796

797



798  
799  
800

**Figure 2**

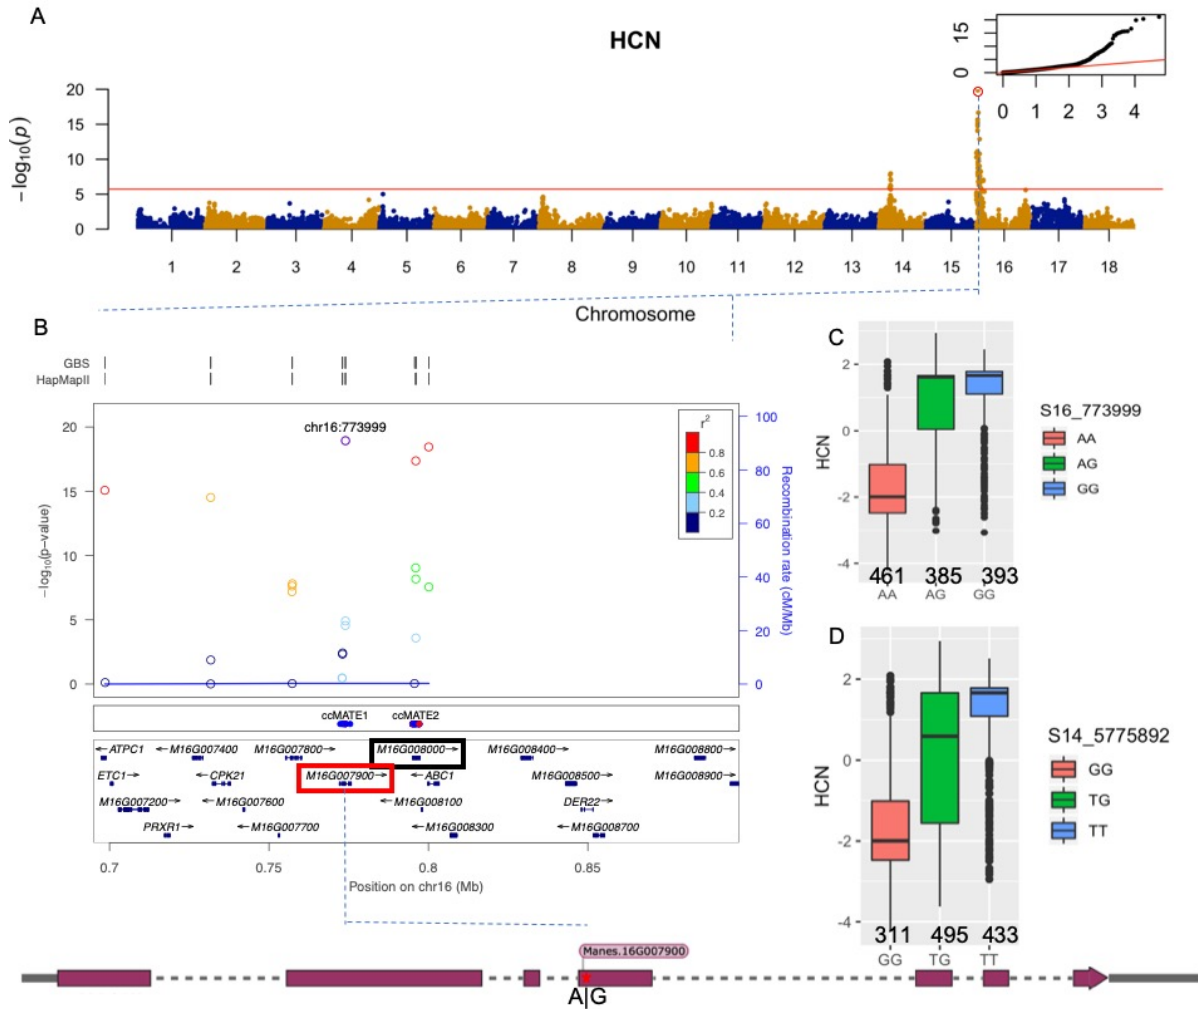

801  
802  
803  
804  
805  
806  
807  
808  
809  
810  
811  
812  
813  
814  
815  
816  
817  
818  
819

**Figure 2.** GWAS of HCN for LA germplasm. **(A)** Manhattan plot from a mixed linear model (MLM-LOCO) with the chromosome on which the candidate SNP is located, excluded from calculating the genetic relationship matrix (GRM). Bonferroni significance threshold is shown in red. A quantile-quantile plot is inserted to demonstrate the observed and expected  $-\log_{10}$  of P-value for HCN. The red circle indicates the candidate SNP. **(B)** LocusZoom plot shows the HCN chromosome 16 associated region ( $-\log_{10} P$  value) around the candidate gene. Top two lines show genomic coverage at the locus, with each vertical tick representing directly genotyped from GBS and HapMap SNPs. Each circle represents a SNP, with the color of the circle indicating the correlation between that SNP and the candidate SNP at the locus (purple). Light blue lines indicate estimated recombination rate (hot spots) in GBS. The middle panel shows 36 single point mutations (red are deleterious) between the region spanning ccMATE1 and ccMATE2. Bottom panel shows genes at each locus as annotated in the cassava genome version 6.1. The red and black rectangle indicate Manes.16G007900 and Manes.16G008000 gene respectively, with Pearson correlation coefficient of 0.96 ( $r^2$ ) between both genes. The lower figure is the gene model with the position indicated of the associated SNP within the 4th exon. **(C and D)** Boxplot showing candidate SNP effect for HCN between each genotype class at the top markers, S14\_6050078 and S16\_773999, respectively.

820 **Figure 3**

**A**

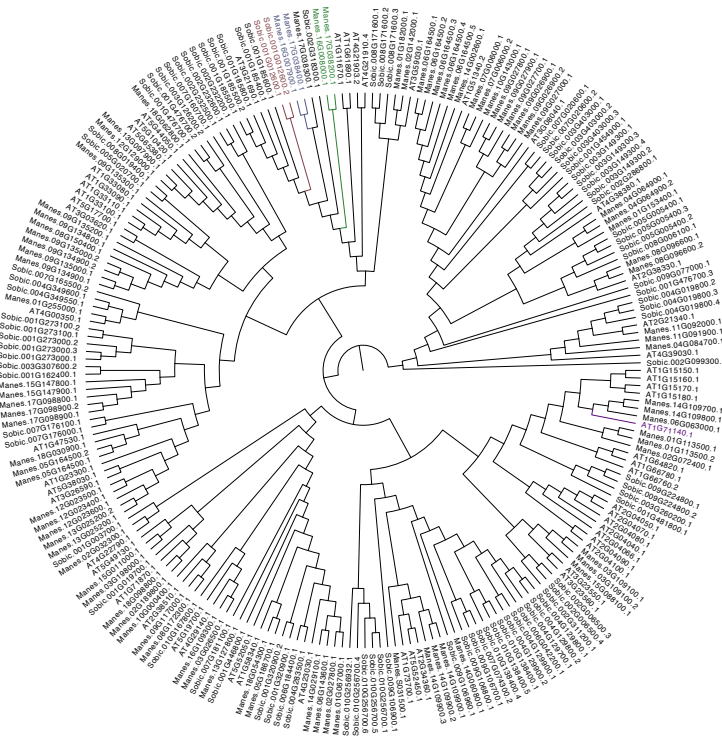

821

0.2

**B**

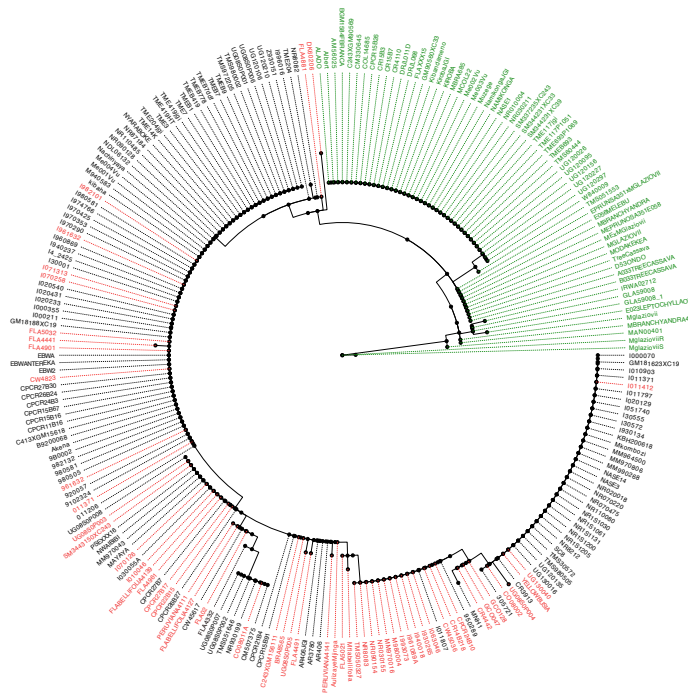

822

0.005

823  
824  
825  
826  
827  
828  
829  
830  
831  
832  
833  
834  
835

**Figure 3.** Phylogeny analysis. **(A)** Protein sequences alignment of MATE genes in cassava, sorghum and Arabidopsis. Protein Alignment and comparative phylogeny show a close sequence homology between the GWAS candidate gene and SbMATE2 (Sobic.001G012600), a characterized vacuolar membrane MATE transporter in Sorghum, functions in the accumulation of plant specialized metabolites such as flavonoids and alkaloids. **(B)** Protein sequence of Manes.16G007900 for the 242 HapMap accessions. Accessions highlighted in red are homozygous GG for SNP16\_773999, identified as having high HCN content. Accession highlighted in green are homozygous AA for SNP16\_773999, identified as low HCN content. Accessions in black are heterozygotes AG or GA for SNP16\_773999.

**Figure 4**

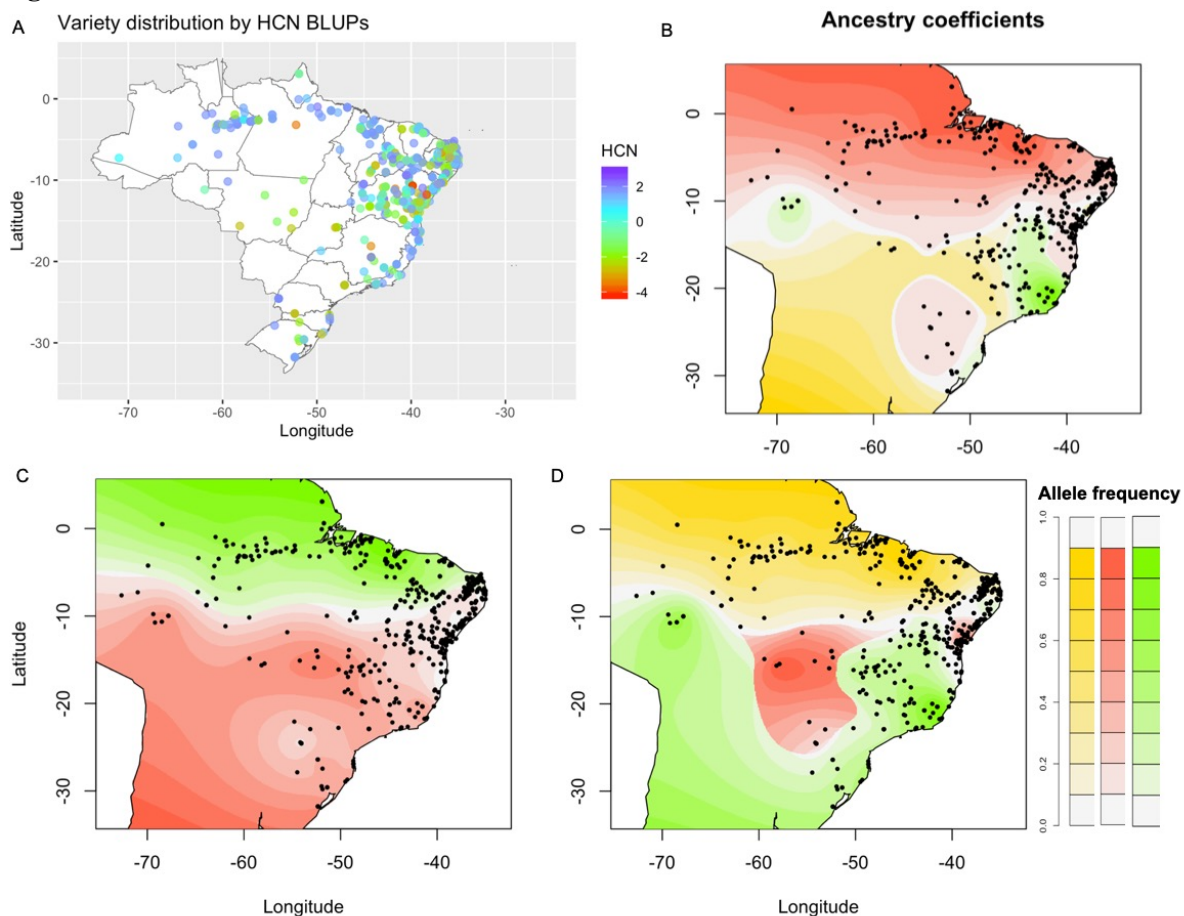

836  
837  
838  
839  
840  
841  
842  
843  
844  
845  
846

**Figure 4.** Spatial distribution of ancestral coefficients for HCN candidate SNPs using 1,657 accessions. **(A)** Distribution of germplasm based on best linear unbiased prediction (BLUP) of HCN. Accessions with high cyanide contributing alleles are grouped around the Amazonas and low cyanide contributing alleles are grouped in other areas of Brazil. **(B)** Spatial distribution of allele frequency for HCN candidate loci in chromosome 14. **(C)** Spatial distribution of allele frequency for HCN candidate loci in chromosome 16. **(D)** Interactions of HCN candidate loci in chromosome 14 and 16.

847

848 **Figure 5**

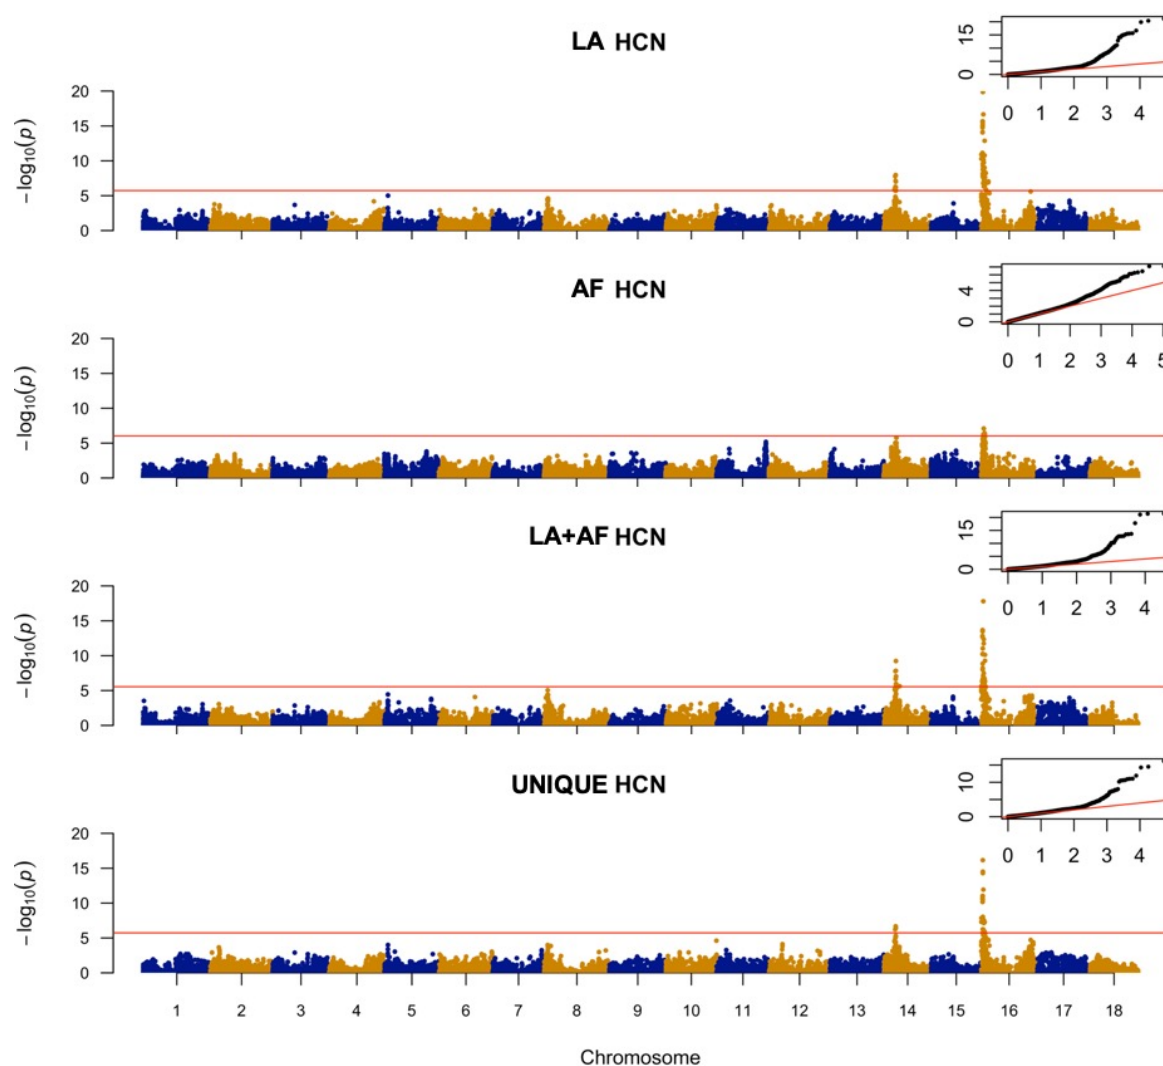

849

850

851 **Figure 5.** Manhattan plot from a mixed linear model (MLM-LOCO) with the chromosome on which  
852 the candidate SNP is located, excluded from calculating the genetic relationship matrix (GRM). The  
853 MLM-LOCO summarizes the genome-wide association results for HCN in **Latin American (LA,**  
854 **Brazilian), African (AF), joint Latin American + African (LA+AF) and Latin American unique**  
855 **(LA UNIQUE)** germplasms. Bonferroni significance threshold is shown in red. A quantile-quantile  
856 plot is inserted to demonstrate the observed and expected  $-\log_{10}$  of P-value for HCN.

857

858

859

860

861

862

863

864

865

866

867

868 **Figure 6**

Manes.16G007900 : Tissue-Specific Gene Expression

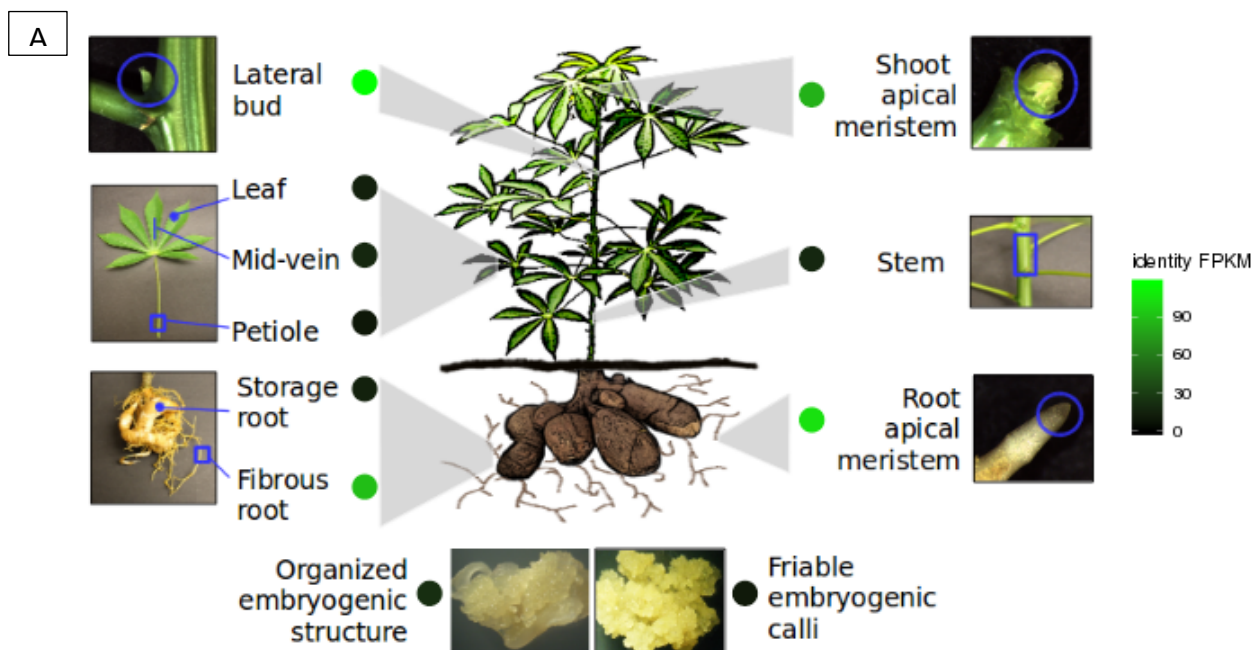

869

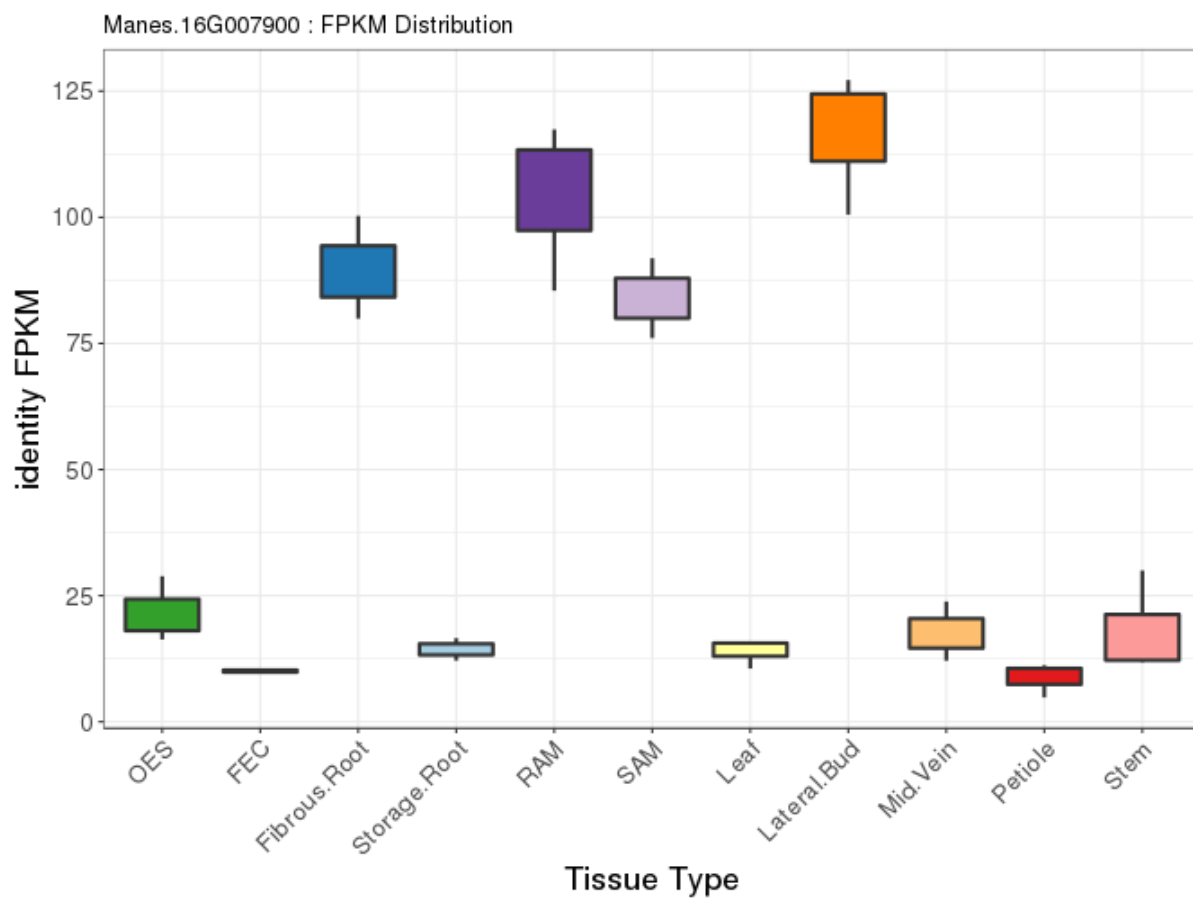

870



Manes.16G008000 : Tissue-Specific Gene Expression

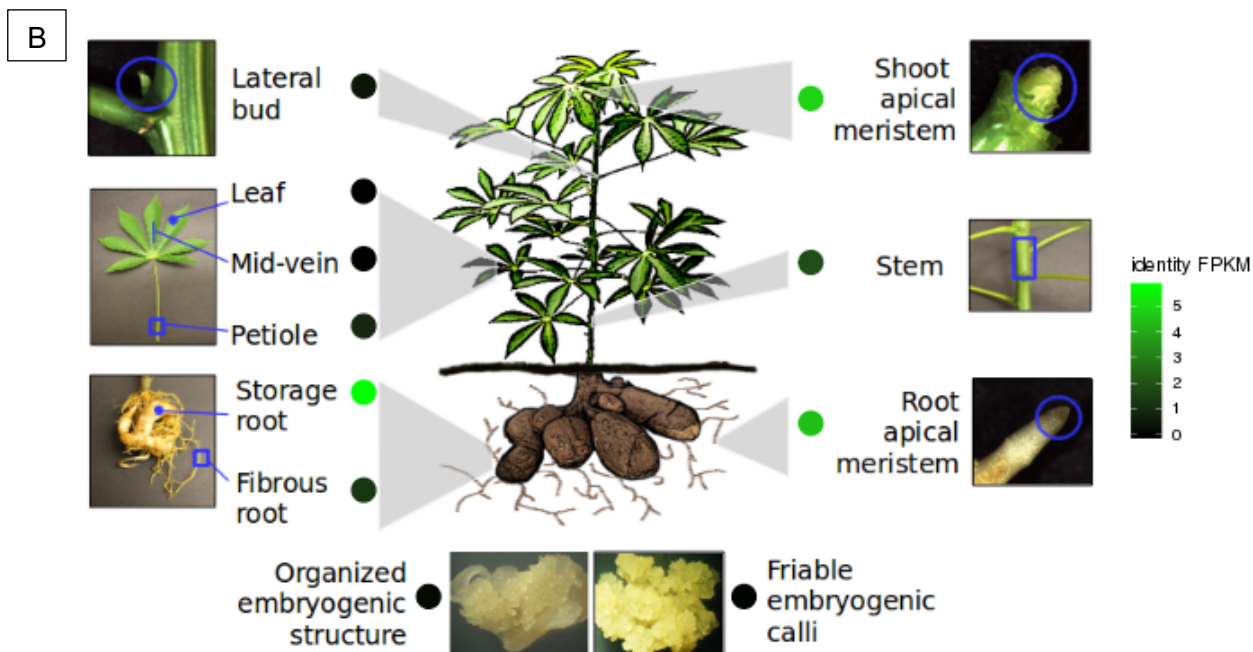

871

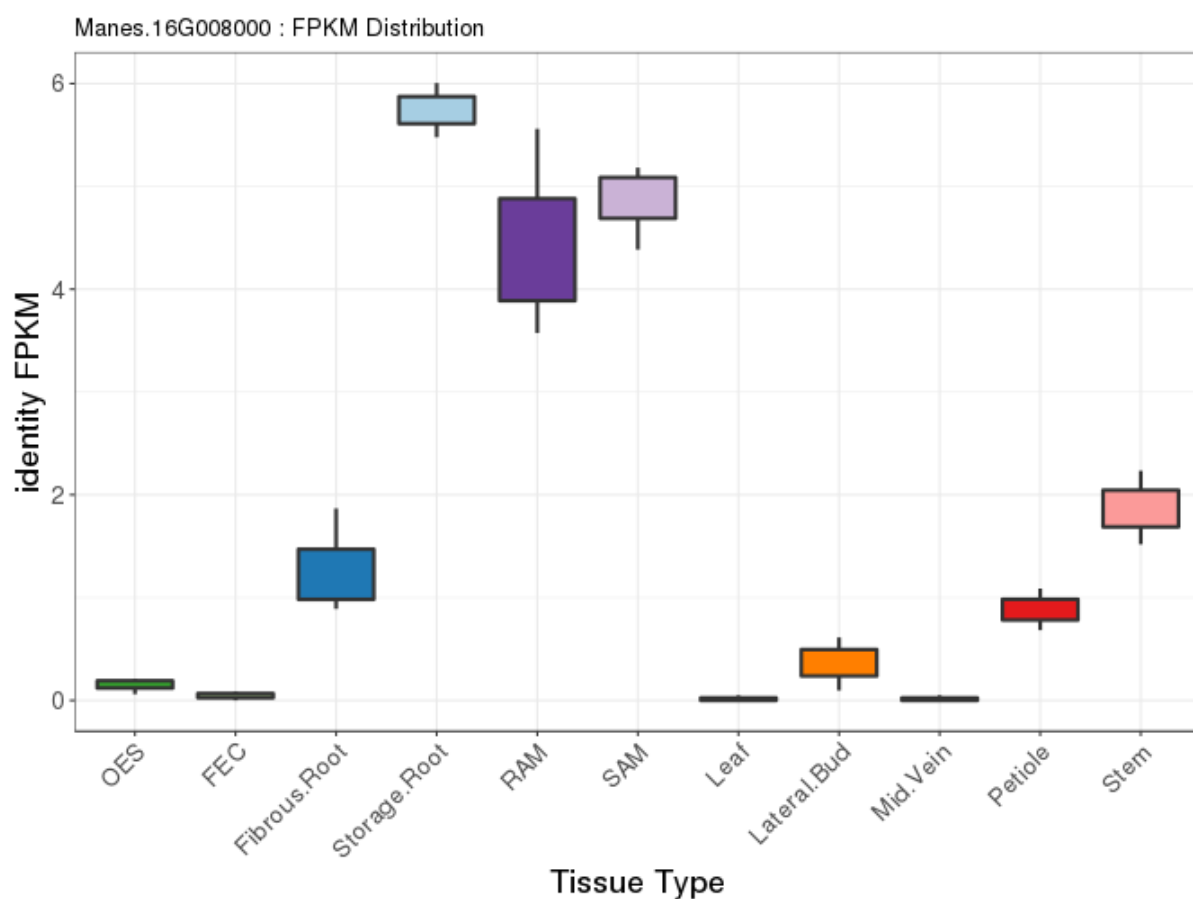

872  
873  
874  
875

876 **Figure 6. (A)** Manes.16G007900 and **(B)** Manes.16G008000 issues/organs expression profiles, three  
877 month after planting (FPKM) of African cassava accession TMEB204 (*Manihot esculenta*) sampled for  
878 gene expression (Wilson et al. 2017). TMEB204, an African variety, was assayed for HCN in a 1997  
879 field experiment carried out at IITA Mokwa location (Nigeria) and forms part of the individuals in our  
880 African dataset with average cyanide content of 5.67 (min=5, max=7). TMEB204 allelic profile for  
881 candidate SNP S16\_773999 on chromosome 16 is heterozygous, indicating dominance of  
882 Manes.16G007900 high cyanide alleles.

883  
884  
885  
886  
887  
888  
889  
890  
891  
892  
893  
894  
895  
896  
897  
898  
899  
900  
901  
902  
903  
904  
905  
906  
907  
908  
909  
910  
911  
912  
913  
914

915 Literature Cited

- 916 Akdemir, Deniz, and Jean-Luc Jannink. 2015. "Locally Epistatic Genomic Relationship Matrices for  
917 Genomic Association and Prediction." *Genetics* 199 (3): 857–71.
- 918 Akdemir, Deniz, Jean-Luc Jannink, and Julio Isidro-Sánchez. 2017. "Locally Epistatic Models for  
919 Genome-Wide Prediction and Association by Importance Sampling." *Genetics, Selection,  
920 Evolution: GSE* 49 (1): 74.
- 921 Albuquerque, Hilçana Ylka Gonçalves de, Hilçana Ylka Gonçalves de Albuquerque, Catia Dias do  
922 Carmo, Ana Carla Brito, and Eder Jorge de Oliveira. 2018. "Genetic Diversity of Manihot  
923 Esculenta Crantz Germplasm Based on Single-Nucleotide Polymorphism Markers." *Annals of  
924 Applied Biology*. <https://doi.org/10.1111/aab.12460>.
- 925 Andersen, Mette Dahl, Peter Kamp Busk, Ib Svendsen, and Birger Lindberg Møller. 2000.  
926 "Cytochromes P-450 from Cassava (*Manihot esculenta* Crantz) Catalyzing the First Steps in the  
927 Biosynthesis of the Cyanogenic Glucosides Linamarin and Lotaustralin." *Journal of Biological  
928 Chemistry*. <https://doi.org/10.1074/jbc.275.3.1966>.
- 929 Barnett, R. D., and C. E. Caviness. 1968. "Inheritance of Hydrocyanic Acid Production in Two  
930 Sorghum × Sudangrass Crosses 1." *Crop Science*.  
931 <https://doi.org/10.2135/cropsci1968.0011183x000800010026x>.
- 932 Bates, Douglas, Martin Mächler, Ben Bolker, and Steve Walker. 2015. "Fitting Linear Mixed-Effects  
933 Models Using lme4." *Journal of Statistical Software*. <https://doi.org/10.18637/jss.v067.i01>.
- 934 Blomstedt, Cecilia K., Roslyn M. Gleadow, Natalie O'Donnell, Peter Naur, Kenneth Jensen, Tomas  
935 Laursen, Carl Erik Olsen, et al. 2012. "A Combined Biochemical Screen and TILLING  
936 Approach Identifies Mutations in Sorghum Bicolor L. Moench Resulting in Acyanogenic Forage  
937 Production." *Plant Biotechnology Journal* 10 (1): 54–66.
- 938 Bokanga, M., Indira J. Ekanayake, A. G. O. Dixon, and M. C. M. Porto. 1994. "GENOTYPE-  
939 ENVIRONMENT INTERACTIONS FOR CYANOGENIC POTENTIAL IN CASSAVA." *Acta  
940 Horticulturae*. <https://doi.org/10.17660/actahortic.1994.375.11>.
- 941 Bradbury, E. Jane, Anne Duputié, Marc Delêtre, Caroline Roullier, Alexandra Narváez-Trujillo,  
942 Joseph A. Manu-Aduening, Eve Emshwiller, and Doyle McKey. 2013. "Geographic Differences  
943 in Patterns of Genetic Differentiation among Bitter and Sweet Manioc (*Manihot Esculenta*  
944 Subsp. *Esculenta*; Euphorbiaceae)." *American Journal of Botany* 100 (5): 857–66.
- 945 Bradbury, Meredith G., Sylvia V. Egan, and J. Howard Bradbury. 1999. "Picrate Paper Kits for  
946 Determination of Total Cyanogens in Cassava Roots and All Forms of Cyanogens in Cassava  
947 Products." *Journal of the Science of Food and Agriculture*. [https://doi.org/10.1002/\(sici\)1097-0010\(19990315\)79:4<593::aid-jsfa222>3.0.co;2-2](https://doi.org/10.1002/(sici)1097-0010(19990315)79:4<593::aid-jsfa222>3.0.co;2-2).
- 948  
949 Bredeson, Jessen V., Jessica B. Lyons, Simon E. Prochnik, G. Albert Wu, Cindy M. Ha, Eric  
950 Edsinger-Gonzales, Jane Grimwood, et al. 2016. "Sequencing Wild and Cultivated Cassava and  
951 Related Species Reveals Extensive Interspecific Hybridization and Genetic Diversity." *Nature  
952 Biotechnology* 34 (5): 562–70.
- 953 Browning, Brian L., and Sharon R. Browning. 2009. "A Unified Approach to Genotype Imputation  
954 and Haplotype-Phase Inference for Large Data Sets of Trios and Unrelated Individuals." *American Journal of Human Genetics* 84 (2): 210–23.
- 955  
956 Brown, M. H., I. T. Paulsen, and R. A. Skurray. 1999. "The Multidrug Efflux Protein NorM Is a  
957 Prototype of a New Family of Transporters." *Molecular Microbiology*.
- 958 Chen, Li, Yushan Liu, Hongdi Liu, Limin Kang, Jinman Geng, Yuzhuo Gai, Yunlong Ding, Haiyue  
959 Sun, and Yadong Li. 2015. "Identification and Expression Analysis of MATE Genes Involved in  
960 Flavonoid Transport in Blueberry Plants." *PloS One* 10 (3): e0118578.
- 961 Cingolani, Pablo, Adrian Platts, Le Lily Wang, Melissa Coon, Tung Nguyen, Luan Wang, Susan J.  
962 Land, Xiangyi Lu, and Douglas M. Ruden. 2012. "A Program for Annotating and Predicting the  
963 Effects of Single Nucleotide Polymorphisms, SnpEff: SNPs in the Genome of *Drosophila*  
964 *Melanogaster* Strain w1118; Iso-2; Iso-3." *Fly* 6 (2): 80–92.
- 965 Darbani, Behrooz, Mohammed Saddik Motawia, Carl Erik Olsen, Hussam H. Nour-Eldin, Birger  
966 Lindberg Møller, and Fred Rook. 2016. "The Biosynthetic Gene Cluster for the Cyanogenic  
967 Glucoside Dhurrin in Sorghum Bicolor Contains Its Co-Expressed Vacuolar MATE

- 968 Transporter.” *Scientific Reports* 6 (November): 37079.
- 969 Doshi, Rupak, Aaron P. McGrath, Miguel Piñeros, Paul Szewczyk, Denisse M. Garza, Leon V.
- 970 Kochian, and Geoffrey Chang. 2017. “Functional Characterization and Discovery of Modulators
- 971 of SbMATE, the Agronomically Important Aluminium Tolerance Transporter from Sorghum
- 972 Bicolor.” *Scientific Reports*. <https://doi.org/10.1038/s41598-017-18146-8>.
- 973 Elshire, Robert J., Jeffrey C. Glaubitz, Qi Sun, Jesse A. Poland, Ken Kawamoto, Edward S. Buckler,
- 974 and Sharon E. Mitchell. 2011. “A Robust, Simple Genotyping-by-Sequencing (GBS) Approach
- 975 for High Diversity Species.” *PloS One* 6 (5): e19379.
- 976 Food and Agriculture Organization of the United Nations. 2018. *Save and Grow: Cassava: A Guide to*
- 977 *Sustainable Production Intensification*. Food & Agriculture Org.
- 978 Glaubitz, Jeffrey C., Terry M. Casstevens, Fei Lu, James Harriman, Robert J. Elshire, Qi Sun, and
- 979 Edward S. Buckler. 2014. “TASSEL-GBS: A High Capacity Genotyping by Sequencing
- 980 Analysis Pipeline.” *PloS One* 9 (2): e90346.
- 981 Gleadow, Roslyn M., and Birger Lindberg Møller. 2014. “Cyanogenic Glycosides: Synthesis,
- 982 Physiology, and Phenotypic Plasticity.” *Annual Review of Plant Biology* 65 (February): 155–85.
- 983 Goodger, J. Q. D., P. K. Ades, and I. E. Woodrow. 2004. “Cyanogenesis in Eucalyptus Polyanthemus
- 984 Seedlings: Heritability, Ontogeny and Effect of Soil Nitrogen.” *Tree Physiology*.
- 985 <https://doi.org/10.1093/treephys/24.6.681>.
- 986 Guindon, Stéphane, Jean-François Dufayard, Vincent Lefort, Maria Anisimova, Wim Hordijk, and
- 987 Olivier Gascuel. 2010. “New Algorithms and Methods to Estimate Maximum-Likelihood
- 988 Phylogenies: Assessing the Performance of PhyML 3.0.” *Systematic Biology* 59 (3): 307–21.
- 989 Hansen, Karina Sinding, Charlotte Kristensen, David Bruce Tattersall, Patrik Raymond Jones, Carl
- 990 Erik Olsen, Søren Bak, and Birger Lindberg Møller. 2003. “The in Vitro Substrate
- 991 Regiospecificity of Recombinant UGT85B1, the Cyanohydrin Glucosyltransferase from
- 992 Sorghum Bicolor.” *Phytochemistry* 64 (1): 143–51.
- 993 He, Chunlin, John Holme, and Jeffrey Anthony. 2014. “SNP Genotyping: The KASP Assay.”
- 994 *Methods in Molecular Biology*. [https://doi.org/10.1007/978-1-4939-0446-4\\_7](https://doi.org/10.1007/978-1-4939-0446-4_7).
- 995 Holland, James B., Wyman E. Nyquist, and Cuauhtemoc T. Cervantes-Martínez. 2010. “Estimating
- 996 and Interpreting Heritability for Plant Breeding: An Update.” *Plant Breeding Reviews*.
- 997 <https://doi.org/10.1002/9780470650202.ch2>.
- 998 Howeler, Reinhardt, Nebambi Lutaladio, and Graeme Thomas. 2013. “Save and Grow: Cassava. A
- 999 Guide to Sustainable Production intensificationProduire plus Avec Moins Ahorrar Para Crecer.”
- 1000 FAO 633.6828 S266. FAO, Roma (Italia). [http://www.sidalc.net/cgi-](http://www.sidalc.net/cgi-bin/wxis.exe/?IsisScript=orton.xis&method=post&formato=2&cantidad=1&expresion=mfn=100365)
- 1001 [bin/wxis.exe/?IsisScript=orton.xis&method=post&formato=2&cantidad=1&expresion=mfn=100](http://www.sidalc.net/cgi-bin/wxis.exe/?IsisScript=orton.xis&method=post&formato=2&cantidad=1&expresion=mfn=100365)
- 1002 [365](http://www.sidalc.net/cgi-bin/wxis.exe/?IsisScript=orton.xis&method=post&formato=2&cantidad=1&expresion=mfn=100365).
- 1003 Jennings, D. L., and C. Iglesias. n.d. “Breeding for Crop Improvement.” *Cassava: Biology,*
- 1004 *Production and Utilization*. <https://doi.org/10.1079/9780851995243.0149>.
- 1005 Jørgensen, Kirsten, Søren Bak, Peter Kamp Busk, Charlotte Sørensen, Carl Erik Olsen, Johanna
- 1006 Puonti-Kaerlas, and Birger Lindberg Møller. 2005. “Cassava Plants with a Depleted Cyanogenic
- 1007 Glucoside Content in Leaves and Tubers. Distribution of Cyanogenic Glucosides, Their Site of
- 1008 Synthesis and Transport, and Blockage of the Biosynthesis by RNA Interference Technology.”
- 1009 *Plant Physiology* 139 (1): 363–74.
- 1010 Jørgensen, Morten Egevang, Hussam Hassan Nour-Eldin, and Barbara Ann Halkier. 2015. “Transport
- 1011 of Defense Compounds from Source to Sink: Lessons Learned from Glucosinolates.” *Trends in*
- 1012 *Plant Science* 20 (8): 508–14.
- 1013 Kakes, P. 1997. “Difference between the Male and Female Components of Fitness Associated with
- 1014 the Gene Ac in *Trifolium Repens*.” *Acta Botanica Neerlandica*.
- 1015 <https://doi.org/10.1111/plb.1997.46.2.219>.
- 1016 Kashala-Abotnes, Espérance, Daniel Okitundu, Dieudonne Mumba, Michael J. Boivin, Thorkild
- 1017 Tylleskär, and Desire Tshala-Katumbay. 2019. “Konzo: A Distinct Neurological Disease
- 1018 Associated with Food (cassava) Cyanogenic Poisoning.” *Brain Research Bulletin* 145
- 1019 (February): 87–91.
- 1020 Katoh, Kazutaka, and Daron M. Standley. 2013. “MAFFT Multiple Sequence Alignment Software
- 1021 Version 7: Improvements in Performance and Usability.” *Molecular Biology and Evolution* 30
- 1022 (4): 772–80.



- 1023 Kizito, Elizabeth Balyejusa, Ann-Christin Rönnerberg-Wästljung, Thomas Egwang, Urban Gullberg,  
1024 Martin Fregene, and Anna Westerbergh. 2007. "Quantitative Trait Loci Controlling Cyanogenic  
1025 Glucoside and Dry Matter Content in Cassava (*Manihot Esculenta* Crantz) Roots." *Hereditas*.  
1026 <https://doi.org/10.1111/j.2007.0018-0661.01975.x>.
- 1027 Koch, B., V. S. Nielsen, B. A. Halkier, C. E. Olsen, and B. L. Møller. 1992. "The Biosynthesis of  
1028 Cyanogenic Glucosides in Seedlings of Cassava (*Manihot Esculenta* Crantz)." *Archives of*  
1029 *Biochemistry and Biophysics* 292 (1): 141–50.
- 1030 Kumar, Prateek, Steven Henikoff, and Pauline C. Ng. 2009. "Predicting the Effects of Coding Non-  
1031 Synonymous Variants on Protein Function Using the SIFT Algorithm." *Nature Protocols* 4 (7):  
1032 1073–81.
- 1033 Leavesley, Heather B., Li Li, Krishnan Prabhakaran, Joseph L. Borowitz, and Gary E. Isom. 2008.  
1034 "Interaction of Cyanide and Nitric Oxide with Cytochrome c Oxidase: Implications for Acute  
1035 Cyanide Toxicity." *Toxicological Sciences: An Official Journal of the Society of Toxicology* 101  
1036 (1): 101–11.
- 1037 Lebot, Vincent. 2009. *Tropical Root and Tuber Crops: Cassava, Sweet Potato, Yams and Aroids*.  
1038 CABI.
- 1039 Lemoine, Frédéric, Damien Correia, Vincent Lefort, Olivia Doppelt-Azeroual, Fabien Mareuil, Sarah  
1040 Cohen-Boulakia, and Olivier Gascuel. 2019. "NGPhylogeny.fr: New Generation Phylogenetic  
1041 Services for Non-Specialists." *Nucleic Acids Research* 47 (W1): W260–65.
- 1042 Li, Legong, Zengyong He, Girdhar K. Pandey, Tomofusa Tsuchiya, and Sheng Luan. 2002.  
1043 "Functional Cloning and Characterization of a Plant Efflux Carrier for Multidrug and Heavy  
1044 Metal Detoxification." *Journal of Biological Chemistry*.  
1045 <https://doi.org/10.1074/jbc.m108777200>.
- 1046 Lippert, Christoph, Jennifer Listgarten, Robert I. Davidson, Scott Baxter, Hoifung Poon, Carl M.  
1047 Kadie, and David Heckerman. 2013. "An Exhaustive Epistatic SNP Association Analysis on  
1048 Expanded Wellcome Trust Data." *Scientific Reports* 3 (January): 1099.
- 1049 Lippert, Christoph, Jennifer Listgarten, Ying Liu, Carl M. Kadie, Robert I. Davidson, and David  
1050 Heckerman. 2011. "FaST Linear Mixed Models for Genome-Wide Association Studies." *Nature*  
1051 *Methods*. <https://doi.org/10.1038/nmeth.1681>.
- 1052 Liu, Jiping, Jurandir V. Magalhaes, Jon Shaff, and Leon V. Kochian. 2009. "Aluminum-Activated  
1053 Citrate and Malate Transporters from the MATE and ALMT Families Function Independently to  
1054 Confer Arabidopsis Aluminum Tolerance." *The Plant Journal: For Cell and Molecular Biology*  
1055 57 (3): 389–99.
- 1056 Los Campos, Gustavo de, John M. Hickey, Ricardo Pong-Wong, Hans D. Daetwyler, and Mario P. L.  
1057 Calus. 2013. "Whole-Genome Regression and Prediction Methods Applied to Plant and Animal  
1058 Breeding." *Genetics* 193 (2): 327–45.
- 1059 Maeda, Shin-Ichi, Mineko Konishi, Shuichi Yanagisawa, and Tatsuo Omata. 2014. "Nitrite Transport  
1060 Activity of a Novel HPP Family Protein Conserved in Cyanobacteria and Chloroplasts." *Plant &*  
1061 *Cell Physiology* 55 (7): 1311–24.
- 1062 Maziya-Dixon, Bussie, Alfred G. O. Dixon, and Abdul-Rasaq A. Adebowale. 2007. "Targeting  
1063 Different End Uses of Cassava: Genotypic Variations for Cyanogenic Potentials and Pasting  
1064 Properties." *International Journal of Food Science & Technology*.  
1065 <https://doi.org/10.1111/j.1365-2621.2006.01319.x>.
- 1066 McMahon, Jennifer M., Wanda L. B. White, and Richard T. Sayre. 1995. "REVIEW ARTICLE."  
1067 *Journal of Experimental Botany*. <https://doi.org/10.1093/jxb/46.7.731>.
- 1068 Morita, Y., A. Kataoka, S. Shiota, T. Mizushima, and T. Tsuchiya. 2000. "NorM of *Vibrio*  
1069 *Parahaemolyticus* Is an Na(+)-Driven Multidrug Efflux Pump." *Journal of Bacteriology* 182  
1070 (23): 6694–97.
- 1071 Mühlen, Gilda Santos, Alessandro Alves-Pereira, Cássia Regina Limonta Carvalho, André Braga  
1072 Junqueira, Charles R. Clement, and Teresa Losada Valle. 2019. "Genetic Diversity and  
1073 Population Structure Show Different Patterns of Diffusion for Bitter and Sweet Manioc in  
1074 Brazil." *Genetic Resources and Crop Evolution*. <https://doi.org/10.1007/s10722-019-00842-1>.
- 1075 Narthey, Frederick. 1968. "Studies on Cassava, *Manihot Utilissima* Pohl—I. Cyanogenesis: The  
1076 Biosynthesis of Linamarin and Lotaustralin in Etiolated Seedlings." *Phytochemistry*.  
1077 [https://doi.org/10.1016/s0031-9422\(00\)85629-0](https://doi.org/10.1016/s0031-9422(00)85629-0).

- 1078 Neelam, Kumari, Gina Brown-Guedira, and Li Huang. 2013. "Development and Validation of a  
1079 Breeder-Friendly KASPar Marker for Wheat Leaf Rust Resistance Locus Lr21." *Molecular*  
1080 *Breeding*. <https://doi.org/10.1007/s11032-012-9773-0>.
- 1081 Nweke, Felix I., John K. Lynam, and Dunstan S. C. Spencer. 2002. *The Cassava Transformation:*  
1082 *Africa's Best-Kept Secret*. Michigan State Univ Pr.
- 1083 Nzwalo, Hipólito, and Julie Cliff. 2011. "Konzo: From Poverty, Cassava, and Cyanogen Intake to  
1084 Toxic-Nutritional Neurological Disease." *PLoS Neglected Tropical Diseases* 5 (6): e1051.
- 1085 Obata, Toshihiro, Patrick A. W. Klemens, Laise Rosado-Souza, Armin Schlereth, Andreas Gisel,  
1086 Livia Stavolone, Wolfgang Zierer, et al. 2020. "Metabolic Profiles of Six African Cultivars of  
1087 Cassava (*Manihot Esculenta* Crantz) Highlight Bottlenecks of Root Yield." *The Plant Journal:*  
1088 *For Cell and Molecular Biology*, January. <https://doi.org/10.1111/tpj.14693>.
- 1089 Oliveira, Eder Jorge de, Cláudia Fortes Ferreira, Vanderlei da Silva Santos, Onildo Nunes de Jesus,  
1090 Gilmara Alvarenga Fachardo Oliveira, and Maiane Suzarte da Silva. 2014. "Potential of SNP  
1091 Markers for the Characterization of Brazilian Cassava Germplasm." *TAG. Theoretical and*  
1092 *Applied Genetics. Theoretische Und Angewandte Genetik* 127 (6): 1423–40.
- 1093 Perrut-Lima, Poliana, Gilda S. Mühlen, and Cassia R. L. Carvalho. 2014. "Cyanogenic Glycoside  
1094 Content of *Manihot Esculenta* Subsp. *Flabellifolia* in South-Central Rondônia, Brazil, in the  
1095 Center of Domestication of *M. Esculenta* Subsp. *Esculenta*." *Genetic Resources and Crop*  
1096 *Evolution*. <https://doi.org/10.1007/s10722-014-0105-6>.
- 1097 Quan, Lijun, Qiang Lv, and Yang Zhang. 2016. "STRUM: Structure-Based Prediction of Protein  
1098 Stability Changes upon Single-Point Mutation." *Bioinformatics*.  
1099 <https://doi.org/10.1093/bioinformatics/btw361>.
- 1100 Rabbi, Ismail Y., Martha T. Hamblin, P. Lava Kumar, Melaku A. Gedil, Andrew S. Ikpan, Jean-Luc  
1101 Jannink, and Peter A. Kulakow. 2014. "High-Resolution Mapping of Resistance to Cassava  
1102 Mosaic Geminiviruses in Cassava Using Genotyping-by-Sequencing and Its Implications for  
1103 Breeding." *Virus Research* 186 (June): 87–96.
- 1104 Ramu, Punna, Williams Esuma, Robert Kawuki, Ismail Y. Rabbi, Chiedozi Egesi, Jessen V.  
1105 Bredeson, Rebecca S. Bart, Janu Verma, Edward S. Buckler, and Fei Lu. 2017. "Cassava  
1106 Haplotype Map Highlights Fixation of Deleterious Mutations during Clonal Propagation."  
1107 *Nature Genetics*. <https://doi.org/10.1038/ng.3845>.
- 1108 R. Core Team. 2015. *An Introduction to R*. Samurai Media Limited.
- 1109 Saier, Milton H., Jr, Vamsee S. Reddy, Brian V. Tsu, Muhammad Saad Ahmed, Chun Li, and Gabriel  
1110 Moreno-Hagelsieb. 2016. "The Transporter Classification Database (TCDB): Recent Advances."  
1111 *Nucleic Acids Research* 44 (D1): D372–79.
- 1112 Santantonio, Nicholas, Jean-Luc Jannink, and Mark Sorrells. 2019. "Prediction of Subgenome  
1113 Additive and Interaction Effects in Allohexaploid Wheat." *G3* 9 (3): 685–98.
- 1114 Sievers, Fabian, Andreas Wilm, David Dineen, Toby J. Gibson, Kevin Karplus, Weizhong Li,  
1115 Rodrigo Lopez, et al. 2011. "Fast, Scalable Generation of High-Quality Protein Multiple  
1116 Sequence Alignments Using Clustal Omega." *Molecular Systems Biology* 7 (October): 539.
- 1117 Siritunga, Dimuth, and Richard Sayre. 2004. "Engineering Cyanogen Synthesis and Turnover in  
1118 Cassava (*Manihot Esculenta*)." *Plant Molecular Biology* 56 (4): 661–69.
- 1119 Sosso, Davide, Dangping Luo, Qin-Bao Li, Joelle Sasse, Jinliang Yang, Ghislaine Gendrot, Masaharu  
1120 Suzuki, et al. 2015. "Seed Filling in Domesticated Maize and Rice Depends on SWEET-  
1121 Mediated Hexose Transport." *Nature Genetics* 47 (12): 1489–93.
- 1122 Takos, Adam M., Camilla Knudsen, Daniela Lai, Rubini Kannangara, Lisbeth Mikkelsen,  
1123 Mohammed S. Motawia, Carl E. Olsen, et al. 2011. "Genomic Clustering of Cyanogenic  
1124 Glucoside Biosynthetic Genes Aids Their Identification in *Lotus Japonicus* and Suggests the  
1125 Repeated Evolution of This Chemical Defence Pathway." *The Plant Journal: For Cell and*  
1126 *Molecular Biology* 68 (2): 273–86.
- 1127 Tshala-Katumbay, Désiré, Jean-Pierre Banea-Mayambu, Théodore Kazadi-Kayembe, Raphaël Nunga-  
1128 Matadi, Fidèle Bikangi-Nkiabungu, Eeg-Olofsson Karin Edebol, and Thorkild Tylleskär. 2001.  
1129 "Neuroepidemiology of Konzo a Spastic Para-Tetraparesis of Acute Onset in a New Area of the  
1130 Democratic Republic of Congo (English)." *African Journal of Neurological Sciences*.  
1131 <https://doi.org/10.4314/ajns.v20i1.7520>.
- 1132 Wang, Shouchuang, Saleh Alseekh, Alisdair R. Fernie, and Jie Luo. 2019. "The Structure and



- 1133 Function of Major Plant Metabolite Modifications.” *Molecular Plant* 12 (7): 899–919.
- 1134 Whankaew, Sukhuman, Supanee Poopear, Supanath Kanjanawattanawong, Sithichoke
- 1135 Tangphatsornruang, Opas Boonseng, David A. Lightfoot, and Kanokporn Triwitayakorn. 2011.
- 1136 “A Genome Scan for Quantitative Trait Loci Affecting Cyanogenic Potential of Cassava Root in
- 1137 an Outbred Population.” *BMC Genomics*. <https://doi.org/10.1186/1471-2164-12-266>.
- 1138 Wheatley, C. C., G. Chuzel, and N. Zakhia. 2003. “CASSAVA | The Nature of the Tuber.”
- 1139 *Encyclopedia of Food Sciences and Nutrition*. <https://doi.org/10.1016/b0-12-227055-x/00181-4>.
- 1140 Wilson, Mark C., Andrew M. Mutka, Aaron W. Hummel, Jeffrey Berry, Raj Deepika Chauhan,
- 1141 Anupama Vijayaraghavan, Nigel J. Taylor, Daniel F. Voytas, Daniel H. Chitwood, and Rebecca
- 1142 S. Bart. 2017. “Gene Expression Atlas for the Food Security Crop Cassava.” *The New*
- 1143 *Phytologist* 213 (4): 1632–41.
- 1144 Wolfe, Marnin D., Ismail Y. Rabbi, Chiedozi Egesi, Martha Hamblin, Robert Kawuki, Peter
- 1145 Kulakow, Roberto Lozano, Dunia Pino Del Carpio, Punna Ramu, and Jean-Luc Jannink. 2016.
- 1146 “Genome-Wide Association and Prediction Reveals Genetic Architecture of Cassava Mosaic
- 1147 Disease Resistance and Prospects for Rapid Genetic Improvement.” *The Plant Genome* 9 (2).
- 1148 <https://doi.org/10.3835/plantgenome2015.11.0118>.
- 1149 Wu, Xinxin, Ren Li, Jin Shi, Jinfang Wang, Qianqian Sun, Haijun Zhang, Yanxia Xing, Yan Qi, Na
- 1150 Zhang, and Yang-Dong Guo. 2014. “Brassica Oleracea MATE Encodes a Citrate Transporter
- 1151 and Enhances Aluminum Tolerance in Arabidopsis Thaliana.” *Plant & Cell Physiology* 55 (8):
- 1152 1426–36.
- 1153 Yabe, Shiori, Hiroyoshi Iwata, and Jean-Luc Jannink. 2018. “Impact of Mislabeling on Genomic
- 1154 Selection in Cassava Breeding.” *Crop Science*. <https://doi.org/10.2135/cropsci2017.07.0442>.
- 1155 Yang, Jian, Andrew Bakshi, Zhihong Zhu, Gibran Hemani, Anna A. E. Vinkhuyzen, Sang Hong Lee,
- 1156 Matthew R. Robinson, et al. 2015. “Genetic Variance Estimation with Imputed Variants Finds
- 1157 Negligible Missing Heritability for Human Height and Body Mass Index.” *Nature Genetics* 47
- 1158 (10): 1114–20.
- 1159 Yang, Jian, S. Hong Lee, Michael E. Goddard, and Peter M. Visscher. 2011. “GCTA: A Tool for
- 1160 Genome-Wide Complex Trait Analysis.” *American Journal of Human Genetics* 88 (1): 76–82.
- 1161 Zhang, Jiarong, Jian Wei, Dongxu Li, Xiangying Kong, Zed Rengel, Limei Chen, Ye Yang, Xiuming
- 1162 Cui, and Qi Chen. 2017. “The Role of the Plasma Membrane H-ATPase in Plant Responses to
- 1163 Aluminum Toxicity.” *Frontiers in Plant Science* 8 (October): 1757.
- 1164 Koh Aoki, Ryosuke Sasaki, Miwa Ohnishi, Aya Anegawa, Yuko Sugiyama, Nozomu Sakurai, Tetsuro
- 1165 Mimura. 2010. “Metabolic changes by the overexpression of a putative vacuolar membrane
- 1166 transporter gene in Arabidopsis leaves and suspension cultured cell.” 21ST INTERNATIONAL
- 1167 CONFERENCE ON ARABIDOPSIS RESEARCH. Publication: 501737462.
- 1168 McKey, D. and S. Beckerman (1993) "Chemical ecology, plant evolution and traditional manioc
- 1169 cultivation systems." In: *Tropical Forests, People and Food: Biocultural interactions and*
- 1170 *applications to development*, eds. C. M. Hladik, A. Hladik, O. F. Linares, H. Pagezy, A.
- 1171 Semple and M. Hadley. Man and the Biosphere Series, vol. 13, UNESCO and Carnforth:
- 1172 The Parthenon Publishing Group: Paris, pp. 83-112.
- 1173 McKey, D.; Beckerman, S. Chemical ecology, plant evolution and traditional manioc cultivation
- 1174 systems. In *Tropical Forests, People and Food: Biocultural Interactions and Applications to*
- 1175 *Development*; Hladik, C.M., Hladick, A., Linares, O.F., Pagezy, H., Semple, A., Hadley, M.,
- 1176 Eds.;
- 1177 Parthenon: Carnforth, UK, and UNESCO: Paris, France, 1993; pp. 83-112.
- 1178 Indira P, Ramanujam T (1987) Distribution of hydrocyanic acid in high-cyanide and a low-cyanide
- 1179 variety of cassava in relation to the age of the plant. *Indian J Agric Sci* 57: 436–437
- 1180 Corkhill L. 1942. Cyanogenesis in white clover (*Trifolium repens* L.) V. The inheritance of
- 1181 cyanogenesis. *N.Z. J. Sci. Technol. B* 23:178–93.
- 1182 de Bruijn GH (1973) The cyanogenic character of cassava (*Manihot esculenta*). In B Nestel, R
- 1183 MacIntyre, eds, *Chronic Cassava Toxicity: Proceedings of an Interdisciplinary Workshop*,
- 1184 January 29–30, 1973, London. International Development Research Centre, Ottawa, pp 43–48.
- 1185 Schappert PJ, Shore JS. 2000. Cyanogenesis in *Turnera ulmifolia* L. (Turneraceae): II. Developmental

- 1186 expression, heritability and cost of cyanogenesis. *Evol. Ecol. Res.* 2:337–52
- 1187 Fukuda, W.M.G., C.L. Guevara, R. Kawuki, and M.E. Ferguson. 2010. Selected morphological and
- 1188 agronomic descriptors for the characterization of cassava. International Institute of Tropical
- 1189 Agriculture (IITA), Ibadan, Nigeria. 19 pp.
- 1190 Fregene, M. and J. Puonti-Kaerlas (2002), “Cassava biotechnology”, in: Hillocks, R.J., J.M. Thresh,
- 1191 and A.C. Bellotti (eds.), *Cassava: Biology, Production and Utilization*, CABI, Wallingford,
- 1192 United
- 1193 Kingdom, pp. 179-207, <http://dx.doi.org/10.1079/9780851995243.0179>.
- 1194 Lebot, V. (2009), *Tropical Root and Tuber Crops: Cassava, Sweet Potato, Yams, and Aroids*, Crop
- 1195 Production Science in Horticulture Series, Volume 17, CABI, Wallingford, United Kingdom.
- 1196 Yuan, Jingwei, et al. (2015) "Genetic parameters of feed efficiency traits in laying period of
- 1197 chickens." *Poultry Science* : pev122.
- 1198 Rubatsky, V.E., and M. Yamaguchi. (1997) *World Vegetables: Principles, Production, and*
- 1199 *Nutritive Values*, 2nd ed. Chapman & Hall, New York, NY.
